# Supplementary material for: Mosaic Genome Architecture of the Anopheles gambiae Species Complex
Source: PLoS One. 2007 Nov 28;2(11):e1249. doi: 10.1371/journal.pone.0001249 (PMC2082662; doi:10.1371/journal.pone.0001249)
Supplement: Table S2 — Raw genotyping data of the 414 individuals at 42 markers. The 42 markers are listed in the first row, and the first two letters in their names (AG) are omitted. The 414 individuals of the A. gambiae complex were grouped into nine populations: molecular forms M (M1 and M2), and S (S1, S2 and S3) of A. gambiae s.s., A. arabiensis (A1 and A2), A. merus (R), and A. melas (L). Each individual of a population is assigned an ID, which consists of the population name followed by a serial number. The sizes of the two alleles at the same locus are given for each individual (numbers with the same ID and the same locus name), indicating either heterozygosity (two alleles have different sizes) or homozygosity (two alleles have the same size). “-9” stands for missing data. (0.27 MB XLS) [file pone.0001249.s008.xls]

## Sheet: TableS2
ID	XH145	XH36	XH503	XH53	XH711w	X1D1	XH678	XE614	XND6U3	2H417	2H290	2H175	2H197	2H187	2H85	2E12D1	2H135	2H770	2H147	2H125	2H786	2H796	2H802	2R7	2H603	2H117	3H93	3H776	3H525	3H158	3H555	3E34B2	3E35B	3E37B	3E38B3	3L09-C1	3E40A1	3E40C1	3H750	3H544EB	3H817	19C20-B1
M1_1	69	192	112	96	124	174	152	320	-9	81	94	96	85	116	147	134	109	156	176	88	95	82	132	136	111	98	152	94	85	101	83	161	157	122	219	165	194	163	82	147	129	147
M1_1	71	198	112	96	124	178	152	320	-9	85	94	96	87	140	147	134	109	170	178	92	95	82	132	136	111	106	156	96	87	101	85	177	159	124	219	171	204	167	92	159	131	161
M1_2	71	198	78	88	126	174	152	308	210	69	90	94	89	100	147	134	115	164	182	94	95	90	132	136	109	100	150	90	85	93	83	181	159	124	219	161	196	163	84	157	127	151
M1_2	75	198	78	90	130	174	152	308	212	69	94	96	95	124	151	134	119	166	182	100	95	90	132	136	129	104	154	90	91	93	85	201	167	126	219	165	202	163	98	159	129	169
M1_3	69	190	82	88	128	174	152	320	206	85	96	94	87	112	147	-9	105	160	-9	92	93	84	130	136	111	100	154	98	87	89	83	163	157	-9	219	165	194	163	86	157	129	161
M1_3	77	220	108	96	132	178	154	320	210	85	100	96	91	142	147	-9	105	166	-9	94	95	84	132	136	111	104	156	98	87	89	89	187	161	-9	219	165	206	191	90	157	129	163
M1_4	79	192	104	90	120	174	154	320	210	69	94	90	89	100	149	128	103	160	178	96	93	84	132	134	111	98	152	96	85	89	87	169	153	124	217	163	194	165	90	157	127	149
M1_4	81	192	112	94	130	178	162	340	214	83	96	104	89	108	151	134	105	166	180	96	95	90	132	134	125	100	154	100	89	89	87	191	157	124	219	165	202	173	90	157	129	151
M1_5	69	188	86	92	124	174	152	316	210	85	90	94	91	106	147	128	103	160	178	92	93	86	132	136	111	100	150	88	83	89	83	165	157	124	219	167	194	159	86	157	131	147
M1_5	69	190	86	102	130	178	152	334	212	85	94	96	93	106	151	130	111	168	178	100	95	90	132	136	125	104	156	88	85	89	85	167	161	124	221	175	198	169	106	159	131	149
M1_6	67	190	104	90	130	178	152	316	210	81	94	98	89	120	147	130	109	158	172	92	93	86	132	136	117	102	156	90	85	89	85	167	161	124	219	165	202	161	96	157	127	157
M1_6	67	190	104	94	134	178	152	320	216	85	96	98	93	124	147	134	119	162	172	92	95	86	132	136	117	102	188	98	87	89	91	167	161	124	219	167	204	165	96	159	131	165
M1_7	67	192	104	90	114	174	152	320	206	81	90	96	89	96	149	130	109	162	176	94	93	88	-9	136	113	98	146	98	85	89	85	161	161	124	219	165	196	161	82	147	129	149
M1_7	69	196	104	92	130	174	152	320	210	85	94	96	89	120	151	134	109	168	178	94	95	88	-9	136	129	102	152	102	87	99	97	169	161	124	219	169	196	163	84	157	129	149
M1_8	67	190	94	96	114	178	152	318	216	87	96	94	89	102	149	134	105	158	176	94	95	86	132	136	111	100	148	90	85	95	83	165	159	124	219	165	194	161	82	159	131	147
M1_8	71	200	104	96	128	178	152	320	228	93	96	98	95	102	153	134	105	162	176	96	97	90	132	136	127	106	156	98	85	95	89	187	163	124	219	173	202	189	84	159	131	159
M1_9	67	192	92	90	134	178	152	318	208	79	94	98	97	114	151	132	103	158	174	88	93	86	132	120	109	100	152	90	85	89	83	189	159	122	219	163	200	159	86	159	129	163
M1_9	71	204	92	92	136	178	154	320	212	79	98	98	97	134	151	134	103	170	178	98	95	90	132	120	123	102	154	98	89	89	85	211	159	126	219	163	202	163	86	159	129	177
M1_10	67	204	104	90	130	174	152	318	210	79	94	96	85	106	149	132	105	168	172	88	95	86	130	120	111	98	156	90	85	87	83	169	157	126	219	163	196	163	84	155	131	151
M1_10	69	204	120	96	130	174	152	320	212	87	94	96	89	136	161	134	105	172	172	88	97	90	130	120	111	102	156	100	89	87	91	177	157	126	219	165	204	169	106	159	131	155
M1_11	67	194	84	90	128	176	152	320	208	87	92	92	91	130	149	130	105	158	174	94	95	80	-9	136	133	100	150	98	85	89	83	161	151	126	219	165	196	165	84	157	129	147
M1_11	69	194	84	100	132	176	152	320	208	87	96	92	91	132	151	134	105	172	184	94	95	86	-9	136	133	102	158	102	87	103	89	171	157	126	219	189	198	195	112	159	129	155
M1_12	67	192	100	90	132	174	152	318	212	81	94	96	87	96	147	130	105	160	176	94	93	82	132	136	111	102	152	98	85	103	85	165	141	128	219	161	196	165	96	151	125	149
M1_12	69	198	100	92	132	174	152	318	228	81	94	100	89	104	149	134	107	164	176	96	95	90	132	136	117	102	154	102	85	103	87	165	163	132	219	163	202	173	110	157	129	163
M1_13	71	192	92	90	110	174	152	280	210	81	90	94	93	94	149	132	105	160	172	92	95	82	132	136	117	100	152	96	87	89	93	161	159	124	217	165	196	163	84	157	127	153
M1_13	77	198	92	92	110	174	152	322	212	81	94	94	93	128	149	134	105	162	172	96	95	90	132	136	117	100	156	96	91	89	125	161	161	124	219	171	206	171	90	157	131	161
M1_14	67	204	98	88	124	174	152	320	212	83	90	96	95	110	145	130	99	160	174	92	91	90	-9	136	115	102	152	94	85	99	85	165	159	126	219	163	196	161	86	157	123	157
M1_14	69	218	104	92	126	174	152	320	212	87	94	96	95	110	149	134	105	170	174	96	95	90	-9	136	125	102	156	98	85	99	89	169	161	128	219	165	198	191	90	159	127	159
M1_15	69	194	128	92	118	174	152	326	-9	79	94	96	85	94	149	132	103	164	-9	94	95	90	-9	134	117	98	152	98	85	89	85	165	159	-9	217	163	-9	169	88	161	123	147
M1_15	69	202	128	92	118	178	154	326	-9	79	98	98	85	116	149	134	103	170	-9	98	95	90	-9	134	117	104	152	98	87	91	101	179	159	-9	219	165	-9	169	88	161	131	167
M1_16	67	192	84	90	128	174	150	320	180	85	92	96	85	106	149	134	93	160	176	92	93	82	132	136	103	100	154	90	83	89	81	161	157	122	217	-9	202	163	86	157	127	159
M1_16	77	198	102	96	132	178	152	320	194	85	96	96	87	128	149	138	105	162	180	96	93	90	132	136	113	100	158	96	85	93	93	165	163	124	219	-9	206	185	90	159	129	177
M1_17	67	192	120	92	128	176	152	320	208	87	90	96	85	108	149	128	111	164	176	92	95	80	138	136	109	100	152	90	87	93	85	161	159	124	219	165	196	165	90	159	129	149
M1_17	73	200	154	96	130	180	154	334	212	87	94	96	89	114	151	130	115	172	176	96	95	80	142	136	111	106	154	90	87	95	85	175	161	124	219	171	196	165	90	159	135	161
M1_18	71	190	100	88	130	174	152	326	210	85	94	96	85	98	151	130	99	164	176	92	95	86	132	136	111	100	146	100	87	93	85	163	161	124	219	165	202	161	82	155	129	151
M1_18	71	204	100	94	132	174	152	326	230	87	94	96	99	122	151	130	111	176	176	92	95	90	138	136	119	102	148	102	89	105	117	167	161	124	221	165	204	173	82	159	133	163
M1_19	69	192	94	94	126	174	152	322	-9	79	92	96	95	104	149	130	107	160	178	92	95	82	-9	136	111	100	150	92	85	93	83	163	157	126	219	163	196	187	86	157	125	153
M1_19	77	196	102	96	126	174	152	322	-9	85	92	96	99	136	151	134	107	162	178	98	95	86	-9	136	133	102	158	96	85	93	89	181	157	126	219	165	202	207	92	157	131	159
M1_20	67	196	82	90	122	174	152	320	208	85	90	94	85	126	147	134	107	160	178	92	95	92	132	136	109	100	152	98	83	101	83	189	157	124	219	163	198	159	84	161	131	157
M1_20	71	198	104	92	134	176	152	340	220	85	94	96	93	138	149	134	107	166	178	102	109	102	134	136	117	102	176	98	83	101	91	205	163	124	219	167	202	183	84	161	139	165
M1_21	77	190	104	90	120	174	152	318	208	79	94	96	91	104	147	132	107	168	174	96	93	82	132	120	111	100	154	96	87	99	87	181	167	-9	219	165	194	163	86	157	123	157
M1_21	77	190	104	90	132	174	152	320	208	87	94	98	91	112	151	134	107	168	174	96	93	86	134	120	125	104	156	96	87	99	89	181	167	-9	219	167	202	185	86	161	131	159
M1_22	71	188	94	92	116	174	152	320	220	69	94	94	85	118	149	134	103	160	174	96	93	84	132	120	109	100	152	90	87	89	83	163	161	124	219	163	198	161	84	159	123	149
M1_22	71	188	94	92	136	174	152	320	220	79	98	94	89	132	153	134	103	168	174	98	95	88	132	120	127	106	154	90	89	91	91	167	161	124	219	173	200	163	106	159	133	165
M1_23	69	190	92	86	134	174	152	308	208	81	94	92	83	94	147	132	99	160	172	92	95	82	132	136	109	98	152	96	87	89	89	163	159	126	-9	145	200	-9	86	157	125	149
M1_23	71	194	92	86	134	178	160	318	214	87	98	100	93	198	151	134	101	162	178	92	95	82	132	136	109	102	160	102	89	89	115	163	159	126	-9	169	202	-9	86	157	129	155
M1_24	67	188	94	92	130	174	152	318	210	81	90	96	89	116	147	132	99	156	174	96	95	82	132	134	111	100	150	90	85	89	87	181	157	124	219	165	194	163	88	157	129	157
M1_24	67	188	112	96	132	174	152	320	214	87	96	96	93	130	151	134	107	168	174	96	95	82	132	134	127	106	154	104	87	89	103	199	157	124	219	167	204	165	110	157	131	163
M2_1	69	220	98	90	124	174	152	326	210	81	94	96	85	108	149	130	99	168	178	92	95	88	132	128	129	100	144	96	85	91	87	169	163	122	217	165	196	159	88	159	129	151
M2_1	69	220	98	98	130	174	152	326	210	81	96	96	89	108	149	130	117	168	180	96	97	92	132	128	135	102	150	98	89	95	87	171	163	124	217	165	200	169	90	159	129	159
M2_2	71	192	86	88	138	174	150	328	218	81	94	96	85	134	147	130	99	166	176	88	97	90	132	126	111	102	148	90	85	89	85	163	161	124	217	163	196	163	86	157	127	151
M2_2	75	198	106	94	136	174	150	346	226	87	96	96	91	176	153	130	113	170	176	92	101	92	132	140	123	104	162	102	85	91	85	173	161	126	221	165	196	163	86	159	129	157
M2_3	73	194	88	92	126	174	152	324	220	81	94	96	85	110	147	134	107	160	174	88	95	98	132	126	121	102	148	96	85	87	85	163	153	124	219	161	196	167	86	157	129	159
M2_3	77	206	94	92	128	178	152	362	230	85	96	96	101	110	151	134	107	168	176	96	95	98	132	132	135	102	150	98	87	99	89	167	155	126	219	165	202	173	86	159	129	159
M2_4	69	194	84	88	126	174	152	312	208	87	94	96	85	108	147	134	107	160	176	88	95	88	130	126	109	102	148	96	85	89	87	167	157	122	219	163	200	167	90	149	129	147
M2_4	69	194	94	90	128	178	152	326	230	87	96	96	103	112	149	134	107	162	178	96	97	92	132	126	125	108	162	102	87	91	89	167	159	126	219	175	202	169	92	157	131	159
M2_5	69	194	88	92	130	174	152	326	222	85	94	96	89	116	151	128	99	170	174	92	91	88	132	132	109	102	152	98	85	87	83	161	157	124	219	169	196	161	84	-9	129	157
M2_5	73	208	88	98	128	174	152	326	228	87	96	96	91	120	151	130	99	170	178	94	95	90	132	186	123	102	152	98	85	89	87	189	157	126	219	171	196	163	88	-9	129	165
M2_6	69	190	98	90	128	174	152	324	208	85	94	94	81	104	151	130	99	162	176	96	95	84	132	126	109	100	152	98	85	89	83	165	161	122	217	169	196	169	86	157	129	147
M2_6	69	196	98	90	126	174	152	324	208	87	96	98	91	136	151	134	105	168	180	98	95	88	132	142	113	102	152	102	85	91	87	189	163	126	217	179	198	169	88	161	129	147
M2_7	65	196	82	90	134	174	154	324	206	81	94	92	85	110	147	130	99	160	174	96	95	84	132	128	111	102	152	98	85	89	89	165	163	122	219	163	196	165	86	157	129	149
M2_7	73	204	112	96	134	174	156	342	216	81	94	98	93	114	147	134	107	164	184	98	95	88	132	128	119	104	152	102	85	113	89	165	163	122	221	167	200	165	106	157	131	171
M2_8	67	190	92	98	124	174	152	324	210	71	94	90	85	124	149	128	103	162	176	92	91	86	132	124	109	100	146	96	85	87	81	175	161	126	219	165	194	159	84	157	129	149
M2_8	75	198	94	100	128	176	152	344	210	81	94	90	101	124	157	134	119	166	176	94	95	88	132	146	111	108	152	100	85	89	89	191	161	126	219	173	198	161	110	157	131	151
M2_9	71	192	100	90	136	-9	152	324	-9	81	94	-9	85	108	147	-9	99	-9	-9	-9	91	-9	-9	128	111	104	144	96	85	91	87	-9	-9	-9	-9	-9	-9	-9	82	161	123	-9
M2_9	71	194	108	94	136	-9	174	324	-9	87	94	-9	95	108	151	-9	105	-9	-9	-9	93	-9	-9	134	113	104	154	102	89	95	89	-9	-9	-9	-9	-9	-9	-9	84	161	129	-9
M2_10	67	190	116	96	126	174	152	324	208	81	94	96	91	112	147	130	99	160	178	98	95	92	132	134	109	100	150	96	87	89	81	163	159	124	219	163	200	159	86	159	125	149
M2_10	69	198	118	104	134	174	152	358	212	87	96	98	95	138	149	130	105	168	178	98	95	94	132	136	125	102	150	98	87	89	85	205	167	126	221	165	202	159	86	159	129	157
M2_11	67	188	94	92	120	174	152	324	210	81	94	98	83	104	149	134	107	160	176	92	97	84	132	126	111	102	146	94	85	89	85	161	159	120	219	165	196	165	98	157	131	149
M2_11	67	188	98	94	126	174	152	326	226	87	94	98	87	106	151	134	111	168	176	96	99	88	142	128	111	102	160	96	85	89	85	165	159	126	219	165	198	175	98	161	131	167
M2_12	67	190	92	90	124	174	152	322	208	85	94	92	83	102	149	134	111	158	174	96	91	84	132	140	111	102	150	98	85	91	85	161	159	124	219	165	200	161	96	159	121	155
M2_12	71	202	98	96	130	174	152	324	212	87	98	96	95	152	151	134	115	166	176	98	95	84	132	144	111	108	152	106	89	93	87	191	159	126	219	165	202	163	104	159	129	165
M2_13	67	192	86	90	120	174	150	324	206	71	94	92	91	106	151	134	101	168	172	92	93	86	132	136	109	100	152	90	85	91	89	177	151	122	217	161	196	161	86	159	123	153
M2_13	71	194	126	90	128	176	154	326	210	89	94	94	91	140	153	134	115	174	172	96	95	94	134	138	113	102	152	98	85	97	105	183	169	122	217	163	204	187	96	159	131	163
M2_14	69	200	112	96	116	176	152	324	210	71	94	94	83	106	149	130	109	160	178	92	95	84	132	126	109	102	152	96	85	89	83	165	157	122	217	163	196	165	82	149	131	149
M2_14	71	202	116	96	116	176	152	326	212	71	96	98	89	176	153	134	109	168	182	94	95	88	142	126	125	104	154	98	87	93	85	165	179	124	217	167	196	203	88	159	135	155
M2_15	67	188	90	92	124	174	152	278	206	81	94	96	89	96	151	130	107	160	176	92	93	88	132	128	107	104	154	94	57	93	89	175	159	122	219	165	198	161	84	157	109	155
M2_15	67	188	102	96	124	174	152	326	230	85	96	96	89	108	155	134	111	160	176	96	129	90	136	136	107	108	154	100	59	99	95	219	163	124	219	171	204	165	92	159	127	165
M2_16	69	192	88	90	124	168	152	314	208	71	94	94	91	104	147	130	101	164	176	94	95	88	132	126	111	104	154	98	85	89	85	163	157	124	219	161	196	171	86	157	131	149
M2_16	75	194	194	92	136	176	152	324	208	83	96	96	103	104	149	134	115	170	182	96	95	94	138	136	137	110	154	102	87	89	91	163	157	124	219	163	198	189	86	157	133	159
M2_17	69	202	108	90	130	174	152	326	210	81	94	94	89	110	149	130	105	166	172	94	95	84	132	130	111	102	148	88	85	97	85	161	157	124	219	161	200	163	84	149	131	147
M2_17	75	216	116	96	132	176	152	326	212	87	94	96	107	136	149	134	117	166	172	94	97	90	132	138	119	104	156	94	91	99	89	175	159	126	219	163	202	163	86	149	131	159
M2_18	69	192	86	90	130	174	152	326	212	87	90	96	89	106	155	134	107	160	170	96	95	86	-9	128	109	90	156	98	85	89	85	165	159	124	219	145	196	163	86	149	125	147
M2_18	69	194	132	104	142	176	154	326	228	87	94	96	91	138	157	134	111	172	170	96	95	92	-9	136	113	102	158	112	87	93	91	165	159	124	219	161	204	169	90	161	129	147
M2_19	69	190	90	94	130	-9	152	326	-9	81	94	-9	89	102	147	-9	105	-9	-9	-9	95	-9	-9	132	123	100	156	92	85	89	87	-9	-9	-9	-9	-9	-9	-9	86	157	129	-9
M2_19	71	192	90	96	138	-9	152	326	-9	85	100	-9	93	126	151	-9	105	-9	-9	-9	95	-9	-9	132	143	104	162	98	85	89	111	-9	-9	-9	-9	-9	-9	-9	110	157	131	-9
M2_20	71	188	114	92	122	174	152	326	208	81	94	92	89	110	147	134	99	156	174	100	95	88	132	128	111	98	144	102	85	87	89	177	157	124	219	165	196	161	88	157	125	157
M2_20	71	194	120	96	126	174	152	326	222	81	94	96	93	122	147	134	107	166	174	100	95	90	132	132	111	104	152	104	87	89	91	189	159	126	219	165	200	169	92	161	131	165
M2_21	69	192	120	94	132	174	154	324	210	81	92	96	87	122	149	130	99	172	180	92	95	84	132	130	141	100	146	98	85	89	89	159	157	122	219	171	202	163	86	157	127	147
M2_21	69	204	120	94	136	176	154	336	214	85	92	96	93	134	159	134	115	172	184	100	97	88	132	138	151	102	150	98	89	93	97	159	157	122	219	173	202	165	88	157	129	159
M2_22	69	192	90	88	114	174	152	324	212	85	90	96	83	138	147	132	105	160	178	92	91	88	132	128	111	102	154	90	85	89	101	163	157	124	219	165	196	159	88	155	125	149
M2_22	71	192	134	92	124	174	152	324	222	85	94	96	91	146	147	134	107	168	178	96	93	88	132	130	117	108	154	100	85	105	109	193	159	124	219	173	200	163	96	159	129	157
M2_23	67	200	110	90	128	174	150	326	210	81	96	94	83	102	147	134	99	160	176	96	93	90	132	124	109	100	148	98	87	87	91	165	157	122	219	163	202	173	88	151	131	159
M2_23	71	202	116	90	142	176	152	326	210	85	98	100	93	102	147	134	117	162	176	96	103	94	132	134	135	102	150	102	87	99	113	165	161	122	219	163	202	177	94	157	135	165
M2_24	69	196	92	90	126	174	152	224	206	81	92	92	83	104	147	130	99	162	176	96	91	86	134	140	109	102	148	94	85	89	91	181	159	124	219	161	196	167	84	159	127	151
M2_24	71	198	102	94	128	176	152	326	210	81	94	94	95	110	151	130	107	164	176	98	93	88	134	146	115	104	154	106	87	91	97	195	163	126	219	167	204	171	88	159	131	161
M2_25	69	192	102	90	126	176	152	324	208	81	94	92	85	116	147	130	103	158	178	88	93	84	132	128	113	90	152	98	85	89	87	161	159	122	219	165	200	161	88	159	127	153
M2_25	71	192	102	92	156	176	152	336	210	81	96	94	87	138	151	134	111	170	182	92	93	90	132	134	127	106	156	98	85	95	89	177	159	126	219	169	204	165	106	159	131	165
M2_26	67	186	88	88	126	174	152	328	206	81	92	96	91	102	147	130	99	160	172	88	93	90	132	132	109	108	150	88	85	91	89	161	157	122	217	163	202	173	92	159	125	147
M2_26	67	190	92	90	128	176	152	328	208	85	94	98	95	122	155	130	99	164	176	88	93	90	132	132	131	108	150	102	85	91	91	185	159	122	219	167	204	177	94	159	131	159
M2_27	67	192	86	88	124	174	152	326	206	85	94	96	83	94	151	134	111	160	178	94	93	-9	-9	130	111	100	150	96	83	89	89	163	155	126	-9	-9	196	-9	86	149	125	159
M2_27	67	194	86	88	130	176	152	326	212	87	96	96	99	122	155	134	115	162	178	112	95	-9	-9	130	117	102	154	98	87	101	91	167	155	126	-9	-9	196	-9	88	159	129	167
M2_28	69	192	102	94	138	174	152	316	208	81	94	94	93	120	151	128	103	166	180	96	93	90	132	128	129	104	152	96	89	93	91	165	159	122	219	165	196	159	84	159	129	149
M2_28	69	194	134	102	144	176	154	326	210	87	96	96	99	138	155	134	107	168	180	96	93	90	132	136	131	104	152	100	89	93	95	165	159	122	219	169	206	159	96	159	131	151
M2_29	69	192	118	88	124	174	152	326	208	85	90	96	83	106	147	130	99	168	174	92	95	86	138	134	109	102	154	98	85	89	83	179	163	122	217	155	200	159	90	149	131	149
M2_29	71	216	118	90	126	174	156	326	212	85	96	100	97	168	153	134	105	168	174	94	95	94	138	138	109	102	186	102	87	95	85	199	163	122	221	167	202	169	94	159	131	151
M2_30	67	190	88	90	124	174	152	326	206	89	92	90	85	112	151	132	99	160	174	92	95	82	132	128	117	100	152	96	85	91	89	163	157	122	219	163	202	161	84	159	129	149
M2_30	73	204	124	98	132	176	152	326	206	89	94	94	89	118	151	132	99	168	176	94	101	88	136	138	123	102	152	98	87	99	115	163	159	128	219	165	204	165	96	159	129	149
M2_31	69	186	92	90	116	174	152	326	210	81	94	96	83	110	147	132	105	160	170	86	95	88	132	126	121	100	150	96	87	95	83	163	157	124	217	161	202	171	88	159	129	159
M2_31	71	194	92	98	130	176	156	342	224	81	96	96	95	150	147	134	105	160	174	86	95	102	132	134	145	102	154	98	87	115	89	163	157	126	217	165	206	171	90	159	129	161
M2_32	69	192	76	90	130	174	152	300	208	71	94	98	89	114	147	130	99	164	176	92	95	90	132	128	109	100	148	104	85	95	85	161	159	124	219	165	200	161	88	157	129	159
M2_32	69	198	94	90	142	176	162	326	210	81	94	98	111	126	147	134	105	172	176	92	95	90	132	134	111	108	148	112	85	103	115	177	159	124	219	167	202	177	90	161	131	159
M2_33	71	192	104	90	130	174	148	328	210	81	94	94	97	108	151	130	113	160	172	88	93	80	132	128	109	102	154	90	85	89	85	165	157	122	217	165	196	159	84	159	127	151
M2_33	75	196	110	98	132	174	152	332	214	83	96	96	105	108	151	130	113	160	172	96	97	90	132	136	111	104	176	90	87	97	85	179	157	126	217	165	196	167	90	159	131	155
M2_34	69	192	92	90	126	174	152	234	206	81	94	96	85	116	147	130	99	162	174	92	95	84	132	142	111	102	150	94	85	95	83	163	157	126	217	155	200	169	84	157	121	147
M2_34	71	192	124	94	130	176	154	326	208	85	94	96	89	124	149	134	113	162	174	98	95	84	132	142	111	104	150	104	85	95	115	171	159	126	217	163	206	175	104	157	129	163
M2_35	67	186	88	90	124	174	152	324	206	81	94	90	89	102	147	130	99	158	178	94	93	86	132	128	113	100	152	90	85	91	89	161	157	124	219	163	200	163	86	159	127	155
M2_35	67	190	92	98	136	174	152	328	216	81	96	96	93	108	147	134	107	160	178	94	93	88	138	130	113	108	176	96	85	95	95	171	159	124	219	167	204	165	92	159	131	157
M2_36	73	194	84	92	120	174	152	326	206	85	94	90	85	96	147	130	99	158	174	98	91	84	132	128	113	102	150	98	85	89	85	163	157	124	219	171	196	167	86	149	129	159
M2_36	73	198	92	92	136	174	152	342	214	87	94	90	87	106	151	130	99	160	180	98	93	84	132	134	117	102	150	100	85	95	115	195	157	126	219	173	198	169	90	157	131	181
M2_37	69	192	112	90	124	174	152	332	206	85	90	94	81	118	149	130	99	160	180	94	95	88	-9	130	111	100	158	90	87	89	85	167	153	122	217	163	196	163	86	157	127	151
M2_37	71	192	122	90	126	176	152	332	222	87	94	98	91	142	151	130	99	164	188	96	95	88	-9	132	111	102	158	102	89	93	85	183	159	122	217	165	202	203	86	157	131	151
M2_38	67	190	88	90	116	174	152	326	206	81	90	94	93	118	147	132	101	156	174	88	95	88	132	132	111	100	148	100	85	89	85	179	161	122	219	165	196	169	84	161	131	159
M2_38	71	220	102	90	126	176	152	326	210	85	96	94	105	126	155	132	107	164	176	96	95	104	132	138	111	102	150	106	85	89	89	181	161	122	219	165	202	169	86	161	131	167
M2_39	69	188	104	90	124	174	152	362	210	81	94	96	89	118	147	132	113	166	170	92	97	82	-9	122	111	100	150	98	85	89	85	163	161	124	219	165	198	167	94	159	125	167
M2_39	73	206	132	90	128	176	152	362	220	87	96	96	91	136	151	132	115	172	174	102	97	92	-9	138	113	108	150	98	91	89	101	183	161	124	219	165	204	181	94	159	129	173
M2_40	75	190	80	90	122	174	152	322	210	81	94	92	85	94	151	132	101	160	172	88	93	82	132	126	109	100	152	92	83	89	85	177	163	124	217	171	204	167	90	161	131	161
M2_40	77	190	80	96	128	174	152	324	228	81	94	96	101	124	155	132	101	166	178	92	99	84	132	140	121	104	160	96	85	89	91	177	165	128	217	187	210	175	90	161	131	169
M2_41	67	188	84	98	128	176	152	324	208	83	96	96	95	120	147	130	101	162	174	92	97	88	132	130	119	104	150	94	85	89	85	171	161	122	219	163	202	159	84	159	131	153
M2_41	69	188	96	98	138	176	162	342	212	85	100	100	97	140	147	134	103	170	178	96	97	90	132	132	127	108	154	94	85	89	85	179	179	126	219	165	204	163	116	159	131	153
M2_42	71	192	86	88	126	174	152	294	210	87	94	94	91	140	149	128	99	168	182	92	93	80	132	132	133	104	152	94	87	87	81	167	157	108	219	155	202	167	86	159	129	149
M2_42	71	208	110	90	136	174	152	326	226	87	94	96	93	156	151	134	115	170	186	100	93	86	138	132	133	104	152	96	89	91	85	167	163	124	219	163	204	173	92	159	129	159
M2_43	67	188	78	92	116	174	152	322	-9	81	94	98	83	102	147	130	99	162	172	88	93	88	-9	128	111	100	150	88	85	87	89	163	159	122	217	161	202	159	84	159	125	155
M2_43	67	194	100	92	144	174	152	322	-9	81	94	100	95	116	149	130	105	166	176	100	95	94	-9	144	117	104	148	98	85	95	125	163	159	122	217	169	204	163	88	159	131	159
M2_44	71	194	90	90	126	174	152	326	206	81	94	94	83	100	149	130	111	156	178	92	95	82	130	126	107	100	150	96	87	89	81	163	157	124	219	167	196	165	84	157	129	155
M2_44	73	224	112	98	150	174	152	342	220	85	94	96	91	110	155	130	111	162	186	94	95	88	132	132	107	102	150	102	87	97	85	165	157	126	219	167	204	165	86	157	129	155
M2_45	69	188	98	88	120	174	152	324	206	87	94	96	83	112	147	128	107	160	176	92	95	86	132	128	111	102	152	92	85	89	81	195	149	-9	219	155	198	163	86	157	131	155
M2_45	71	192	132	90	124	176	152	324	210	87	96	100	89	124	151	132	109	162	178	96	95	86	132	152	111	108	154	94	87	95	89	201	159	-9	219	165	222	177	102	157	131	159
M2_46	69	196	88	88	122	174	152	324	206	81	94	90	91	114	149	128	101	158	180	96	93	88	132	132	115	102	146	98	85	89	89	169	157	122	219	167	196	165	86	159	131	157
M2_46	73	204	116	90	124	176	152	326	210	87	94	96	93	122	153	130	107	160	190	96	97	88	132	136	117	104	158	102	137	89	89	173	161	122	219	171	200	173	86	159	131	161
M2_47	71	192	92	90	120	176	152	324	208	71	94	96	91	98	145	130	99	162	178	88	95	86	132	138	109	102	148	96	85	89	89	181	159	122	219	165	198	173	88	149	133	157
M2_47	71	194	112	90	136	176	152	326	218	81	96	98	93	118	153	134	99	164	178	96	113	90	132	142	115	108	150	98	89	89	133	189	159	122	219	169	200	173	88	157	133	163
M2_48	67	190	70	90	134	174	152	324	208	81	90	96	83	102	151	130	109	160	172	88	95	84	132	136	127	102	152	90	85	91	85	171	153	122	219	165	196	161	86	159	111	151
M2_48	67	190	132	90	148	176	152	324	220	85	96	96	99	116	153	134	115	166	180	98	95	86	132	136	183	110	152	100	85	93	95	185	161	122	219	165	200	185	88	159	129	155
M2_49	67	192	84	92	124	174	152	324	206	81	94	96	83	110	147	130	109	158	176	96	93	84	132	126	111	100	146	96	85	89	85	163	159	124	217	163	200	159	84	159	131	159
M2_49	67	194	106	92	130	176	152	324	212	87	94	96	83	110	149	134	111	162	180	102	95	90	132	154	127	102	154	100	85	89	99	163	159	124	219	165	202	179	90	159	133	169
M2_50	69	186	86	90	116	174	152	288	204	71	90	94	83	98	147	128	111	160	174	88	93	88	132	128	109	102	156	96	87	89	89	167	157	122	219	161	196	163	96	157	131	157
M2_50	77	198	94	98	124	174	152	326	212	85	98	96	83	106	151	130	111	170	190	94	95	88	132	128	109	106	186	96	87	109	91	199	189	122	219	163	202	195	96	157	131	159
M2_51	69	192	100	92	130	176	152	324	210	83	94	96	89	106	153	130	109	158	176	94	95	90	-9	128	111	104	152	88	85	89	89	161	157	-9	219	163	196	161	86	161	131	151
M2_51	71	200	116	96	134	176	152	326	212	87	94	98	107	142	153	134	109	162	176	96	95	90	-9	140	117	104	152	90	85	99	91	189	169	-9	219	165	196	173	116	161	133	159
M2_52	69	188	88	90	132	174	152	326	208	85	96	96	93	112	147	130	101	160	176	92	91	84	132	128	111	100	150	90	85	91	89	165	157	122	217	163	196	161	86	159	125	149
M2_52	69	190	126	92	132	174	154	326	212	87	100	96	115	136	151	132	119	162	176	96	93	88	132	138	111	108	158	90	85	99	89	189	157	122	217	173	200	161	86	159	127	159
M2_53	67	192	104	92	124	176	152	326	230	85	94	94	91	100	145	130	99	160	176	92	91	88	132	126	109	100	152	96	85	89	89	163	159	124	217	169	196	161	86	159	127	155
M2_53	69	194	146	96	124	178	152	326	234	87	96	96	93	100	147	134	105	160	176	94	95	90	132	140	111	100	152	96	89	89	89	189	161	126	217	171	200	169	98	159	129	157
M2_54	67	192	84	88	128	174	152	324	-9	71	94	90	89	110	151	130	105	158	176	94	93	84	132	126	129	102	152	86	85	93	91	163	159	120	217	163	200	161	86	151	133	155
M2_54	69	198	124	96	130	174	152	332	-9	81	94	96	97	176	155	130	105	164	178	94	95	88	132	128	133	108	152	96	87	115	91	169	161	120	219	165	202	165	88	161	135	159
M2_55	69	192	102	90	120	168	154	-9	212	71	94	96	83	114	147	128	107	164	172	92	95	86	132	126	109	102	152	90	87	93	85	171	157	124	219	163	198	169	86	157	129	147
M2_55	69	232	102	96	126	170	154	-9	214	85	96	100	89	124	151	134	111	168	172	92	97	90	132	140	129	102	180	96	87	105	87	179	159	124	219	165	202	171	90	159	129	159
M2_56	69	192	76	90	132	174	158	326	210	85	90	94	95	118	149	128	105	160	172	88	93	86	132	130	109	100	150	96	89	87	85	167	157	122	217	161	196	165	82	157	125	157
M2_56	71	204	88	92	136	176	160	340	214	87	96	96	101	130	151	130	121	168	182	94	95	90	142	132	111	106	154	96	91	89	85	185	157	122	217	175	204	167	86	157	127	193
M2_57	69	190	90	88	132	174	152	324	206	81	94	90	91	122	147	134	105	160	174	88	93	84	132	130	111	102	150	96	85	95	85	161	157	122	215	163	196	165	86	151	127	147
M2_57	71	196	90	90	142	174	162	324	212	81	96	94	97	152	151	134	107	160	176	92	127	90	134	130	111	106	186	100	85	103	89	165	167	126	221	165	196	165	86	161	133	149
M2_58	69	202	92	94	116	174	152	326	210	71	94	90	79	96	151	132	99	158	174	92	95	84	132	128	111	102	150	96	85	97	81	167	159	-9	219	163	202	161	86	157	129	149
M2_58	73	214	160	98	130	174	156	338	214	87	94	94	109	110	151	132	99	162	176	98	97	86	132	138	111	108	154	98	89	109	87	167	159	-9	219	163	206	163	88	157	129	157
M2_59	69	198	90	92	124	174	148	324	204	83	94	96	83	102	149	130	107	162	176	94	93	84	-9	126	109	102	152	84	85	89	91	161	-9	126	219	163	196	167	86	159	129	149
M2_59	69	206	116	94	124	174	150	324	208	85	96	98	83	104	151	134	107	162	182	94	93	94	-9	140	157	102	152	96	87	111	91	169	-9	126	219	163	204	175	92	159	129	163
M2_60	67	188	90	88	124	174	152	304	222	83	90	96	89	112	147	130	105	162	182	-9	93	88	132	126	109	90	152	98	85	87	85	169	157	124	219	161	196	165	86	157	127	157
M2_60	73	196	108	90	134	174	152	326	222	87	94	96	93	118	153	134	107	166	182	-9	93	88	134	132	111	108	180	100	87	99	97	169	157	124	219	189	204	169	88	157	129	165
M2_61	67	196	88	88	124	170	152	326	208	81	94	92	91	106	147	132	107	160	176	92	89	88	132	130	111	104	148	96	85	89	89	167	157	122	219	163	196	159	84	159	129	149
M2_61	71	198	128	102	124	176	160	334	226	85	94	96	97	132	147	134	107	166	182	100	93	88	132	138	137	104	180	98	85	95	93	183	161	126	219	165	196	163	86	159	129	169
M2_62	73	190	100	92	136	174	152	314	216	71	94	94	89	100	149	130	99	162	172	96	93	86	132	128	111	102	146	94	85	89	91	169	157	124	219	163	196	159	86	149	129	153
M2_62	75	192	126	98	140	176	156	340	228	85	96	98	93	102	151	134	107	164	186	98	93	90	132	128	111	102	152	100	93	93	91	177	161	126	221	169	200	167	88	157	131	161
M2_63	67	194	102	96	118	176	150	326	206	71	94	94	89	138	151	130	99	160	164	94	93	88	-9	132	111	102	156	98	85	93	87	169	157	124	219	165	202	159	86	159	125	157
M2_63	71	194	106	98	144	176	152	326	210	81	96	96	91	138	153	134	105	168	174	100	93	88	-9	138	111	104	156	100	87	95	91	197	159	124	221	169	202	163	90	159	125	163
M2_64	69	192	84	90	124	174	152	326	210	81	94	96	89	102	147	130	99	158	174	96	95	90	-9	126	119	100	150	98	85	93	89	165	157	122	215	161	196	167	86	159	129	163
M2_64	73	194	84	90	130	176	152	330	212	87	96	98	89	146	147	134	119	168	190	96	95	90	-9	148	151	104	154	98	89	93	107	169	161	124	217	167	202	169	86	159	131	169
M2_65	75	192	96	90	130	174	152	324	210	85	94	94	93	110	151	-9	99	168	178	88	95	82	132	128	115	100	152	94	83	93	89	193	157	-9	215	165	196	169	88	149	125	157
M2_65	77	198	108	90	130	176	152	324	230	85	94	96	95	126	153	-9	109	170	178	92	99	84	132	138	115	104	152	98	85	101	89	195	159	-9	217	169	196	171	94	149	129	157
M2_66	67	198	94	92	132	176	152	326	208	81	94	96	89	112	143	130	99	158	176	88	99	86	-9	126	107	100	150	98	85	101	87	171	151	124	217	165	194	159	78	159	125	145
M2_66	69	198	100	92	132	176	160	340	208	85	96	96	89	112	147	134	103	164	180	92	101	90	-9	130	127	108	158	104	87	101	89	171	153	126	219	175	204	169	86	159	129	147
M2_67	71	192	80	88	122	174	152	324	208	81	94	96	83	140	147	130	99	162	176	94	95	84	132	128	109	104	154	98	87	87	89	159	159	124	219	163	196	161	88	159	129	157
M2_67	73	198	92	98	130	174	160	326	210	83	96	98	83	196	153	134	99	168	176	94	95	90	132	148	109	106	154	98	87	91	93	165	159	126	221	171	200	163	90	159	131	157
M2_68	69	190	86	90	136	174	152	326	210	85	90	94	83	108	149	134	107	166	176	92	95	90	-9	124	117	102	150	100	85	89	87	185	161	122	219	161	196	159	86	157	133	147
M2_68	77	202	86	92	136	176	154	326	210	85	94	98	87	108	149	134	107	172	176	96	95	90	-9	136	147	102	152	100	87	89	87	189	165	122	219	165	198	169	86	157	135	147
M2_69	69	194	106	94	120	174	156	214	206	87	94	90	93	102	149	130	115	158	176	92	95	88	-9	138	115	96	150	96	85	89	89	163	159	124	219	163	200	159	88	155	131	163
M2_69	75	204	108	96	132	174	164	290	208	87	98	96	99	108	153	130	115	166	176	92	95	98	-9	148	115	102	152	98	87	91	95	191	159	124	219	167	200	175	88	159	131	165
M2_70	69	196	84	90	134	178	154	256	210	81	90	94	95	132	147	130	103	160	176	88	95	88	-9	126	109	102	156	90	85	89	87	171	157	-9	219	165	198	165	86	159	127	149
M2_70	71	200	104	94	138	178	158	324	226	85	94	94	95	132	153	134	109	164	176	92	95	90	-9	126	109	104	160	98	85	89	89	189	159	-9	219	169	198	165	114	161	129	157
M2_71	71	190	110	90	134	174	154	324	208	71	94	96	93	130	149	134	99	160	174	88	95	84	-9	124	109	108	146	96	85	89	85	159	161	124	219	161	200	159	84	159	129	157
M2_71	71	190	156	96	138	180	154	334	212	81	98	96	97	130	149	134	117	168	176	92	97	84	-9	124	109	108	156	102	85	91	87	201	161	124	219	163	202	169	86	159	129	159
M2_72	69	190	96	94	132	178	154	328	208	71	94	94	89	104	147	132	99	160	172	94	95	92	-9	138	111	102	156	100	85	89	91	167	157	122	219	163	196	163	86	159	129	159
M2_72	69	192	110	94	142	178	154	328	212	81	94	96	91	126	151	134	111	164	172	96	95	92	-9	144	111	102	156	100	87	89	129	191	157	124	221	167	200	189	90	159	133	159
M2_73	69	186	102	94	126	178	154	328	-9	85	94	94	83	106	147	-9	111	160	-9	92	95	84	-9	134	115	100	148	96	85	89	87	167	157	-9	219	165	198	165	108	161	123	161
M2_73	73	192	126	102	126	178	154	328	-9	87	94	94	83	134	161	-9	111	160	-9	94	95	84	-9	134	115	108	154	102	85	99	91	167	161	-9	219	165	206	169	108	161	129	175
M2_74	67	192	82	94	124	176	154	212	208	81	94	96	89	110	147	130	99	156	174	94	95	86	132	126	107	102	152	96	85	89	85	169	159	124	219	165	202	183	88	157	111	155
M2_74	69	194	90	96	132	176	154	328	228	87	98	98	89	120	149	134	105	172	174	96	95	86	136	132	117	106	154	100	85	89	97	175	159	130	219	165	206	191	88	161	131	161
M2_75	67	188	100	88	130	174	154	290	220	71	94	96	87	98	149	128	105	162	178	94	95	84	132	124	111	102	150	88	85	91	85	161	159	122	219	163	196	163	88	157	127	155
M2_75	69	200	114	90	136	178	154	328	228	81	96	98	95	108	153	134	115	164	178	94	95	88	132	134	111	108	180	102	87	97	89	165	161	124	219	171	198	163	88	161	133	161
M2_76	71	192	108	92	132	174	154	328	206	81	94	96	95	92	147	130	99	160	172	96	95	90	132	132	111	102	152	96	85	87	89	161	157	126	219	165	198	161	86	159	125	157
M2_76	75	196	108	94	142	178	154	330	210	85	96	98	95	118	151	136	107	166	174	96	101	92	132	138	119	102	152	96	85	93	95	161	157	126	219	167	200	171	94	159	131	161
M2_77	69	194	84	94	132	176	154	214	206	81	94	94	85	132	147	130	99	162	172	88	93	88	132	130	111	108	148	98	85	89	89	165	157	124	217	167	196	161	86	159	131	141
M2_77	71	194	114	94	132	176	154	328	210	87	94	96	91	132	151	134	109	164	182	92	97	90	132	140	111	108	154	102	87	91	91	175	157	124	217	171	204	161	86	159	131	147
M2_78	71	188	82	92	128	176	152	214	206	81	90	92	91	120	151	134	111	168	176	88	95	88	-9	132	109	102	152	90	85	87	83	165	157	124	219	165	196	159	86	157	125	157
M2_78	73	194	110	96	136	176	154	332	214	85	94	96	99	192	151	134	115	168	176	94	95	88	-9	138	113	104	154	100	89	105	85	171	157	126	219	169	202	161	90	159	129	163
M2_79	69	190	82	90	124	170	154	214	210	85	90	90	83	104	147	130	99	166	174	92	93	88	132	140	109	104	154	92	85	89	85	165	151	124	219	167	196	171	90	161	129	151
M2_79	75	196	82	90	138	176	154	328	230	87	94	96	83	136	151	134	103	168	178	94	95	88	132	174	111	108	160	92	85	95	85	171	195	126	219	173	200	199	98	161	129	157
M2_80	67	202	82	92	132	176	152	214	206	81	92	94	93	110	149	130	105	160	180	92	93	86	-9	134	109	104	150	100	85	89	89	165	153	124	219	163	196	179	84	159	125	163
M2_80	69	204	108	94	132	176	158	326	220	81	94	96	97	120	149	134	109	166	182	92	95	94	-9	136	119	108	158	100	85	91	115	181	157	124	219	165	198	191	84	159	129	171
S1_1	67	188	88	90	134	174	160	248	220	87	98	96	83	90	145	130	99	158	174	92	95	84	132	124	133	102	150	90	87	89	85	169	157	122	217	167	196	173	84	149	125	171
S1_1	67	190	124	92	142	178	164	282	220	87	100	96	95	92	155	130	105	168	186	94	95	84	142	132	115	106	150	98	87	89	87	175	157	122	217	187	224	181	86	155	131	175
S1_2	69	188	114	88	130	174	166	240	222	85	94	98	85	98	145	132	99	160	172	90	81	92	132	132	109	102	150	90	85	89	85	169	-9	122	219	169	200	163	86	159	129	149
S1_2	71	192	114	90	134	178	222	270	226	85	104	98	95	100	149	132	99	170	172	94	97	92	142	140	141	108	150	96	87	103	89	169	-9	128	219	191	202	165	86	159	131	169
S1_3	69	194	106	92	130	174	158	258	220	85	94	98	85	96	149	134	99	160	178	88	93	82	132	128	109	104	150	90	85	87	83	191	-9	-9	219	165	200	161	84	143	127	147
S1_3	69	194	126	100	138	174	162	288	222	87	96	98	87	98	163	134	107	168	178	106	95	86	132	132	113	104	186	98	87	89	89	203	-9	-9	219	165	202	191	84	159	129	159
S1_4	67	192	94	90	126	174	158	242	222	81	90	96	87	104	149	132	107	156	178	92	93	82	132	126	111	102	150	98	83	89	83	161	163	122	219	165	200	161	86	157	127	147
S1_4	71	202	94	94	128	178	190	248	222	85	98	96	117	156	149	134	107	164	178	96	95	82	136	140	111	102	150	98	85	89	89	165	163	122	219	185	204	161	86	157	129	149
S1_5	67	190	94	90	138	174	160	240	220	85	94	94	85	150	151	-9	99	162	-9	98	97	84	-9	118	117	100	150	90	85	95	85	163	163	-9	219	163	198	159	84	159	123	151
S1_5	71	194	98	92	138	174	164	274	224	87	96	96	87	150	153	-9	103	164	-9	98	97	88	-9	126	123	106	176	96	85	99	87	189	169	-9	219	169	202	191	90	159	129	187
S1_6	71	192	88	90	128	178	162	240	218	71	94	90	83	100	149	130	99	162	178	92	95	84	132	130	117	102	148	94	87	89	87	163	153	122	219	171	200	161	88	159	129	161
S1_6	71	206	106	90	134	178	182	268	222	81	98	100	89	120	155	134	105	164	180	92	95	90	132	132	119	104	148	100	87	105	93	171	159	126	219	185	204	161	88	159	129	171
S1_7	67	192	108	86	130	178	162	240	-9	89	94	98	85	126	149	134	99	160	178	96	93	76	132	128	129	102	150	90	57	89	87	167	163	122	217	167	200	161	86	161	129	157
S1_7	69	206	136	98	134	178	162	240	-9	91	96	98	85	170	151	134	103	166	178	96	95	82	132	130	141	104	180	96	59	93	89	167	163	128	217	169	200	171	86	161	131	183
S1_8	69	196	100	88	138	174	160	240	216	85	90	96	83	94	151	132	95	160	176	92	93	84	132	124	111	102	144	96	85	87	85	165	155	122	219	167	204	159	82	161	127	147
S1_8	71	196	138	92	138	178	160	280	222	87	92	96	83	130	151	134	99	162	176	94	93	92	132	124	133	106	150	96	85	89	93	165	155	122	219	171	220	161	82	163	133	181
S1_9	69	192	82	92	124	174	162	286	220	81	94	96	87	104	149	132	99	162	176	96	95	88	132	126	103	100	150	90	83	89	85	161	159	122	215	171	200	161	86	159	131	153
S1_9	71	204	112	92	128	174	162	286	220	99	98	98	87	152	153	136	115	172	188	96	95	88	132	130	111	100	150	90	95	97	97	173	163	124	217	185	200	161	96	159	131	157
S1_10	67	192	94	88	118	174	166	234	220	83	94	94	85	126	149	132	97	164	176	88	95	82	132	122	115	102	144	98	87	91	93	169	159	122	217	167	204	161	84	147	129	151
S1_10	69	202	100	92	126	178	174	240	222	83	96	96	113	158	167	132	99	170	186	96	95	82	132	122	119	102	150	106	91	91	115	187	165	128	217	171	206	169	86	157	133	159
S1_11	69	182	92	88	128	174	154	240	224	87	96	98	95	94	153	134	99	158	174	92	95	82	132	126	113	100	148	96	83	87	83	161	157	124	217	167	204	163	86	157	129	149
S1_11	71	192	92	88	138	174	160	286	224	87	96	100	95	126	175	140	109	160	178	92	95	86	140	126	133	104	158	98	85	91	85	161	161	126	217	189	220	167	96	157	129	199
S1_12	69	190	80	88	128	174	162	274	222	81	94	90	85	114	149	134	97	162	182	92	93	88	132	132	109	102	152	94	85	89	85	191	157	122	219	167	202	159	84	157	125	161
S1_12	71	206	124	90	132	178	186	274	222	85	98	98	85	134	159	134	103	162	182	94	93	90	132	134	109	102	172	98	87	95	87	193	161	124	219	169	204	163	84	157	125	165
S1_13	69	198	88	88	126	174	162	240	220	83	94	98	91	116	143	130	101	160	174	90	95	90	134	130	109	102	148	90	85	89	85	175	-9	126	215	171	200	159	90	159	129	149
S1_13	71	204	114	90	130	174	162	286	222	83	96	98	91	128	163	134	111	162	178	92	107	92	136	134	109	104	158	98	87	89	89	185	-9	130	219	171	210	161	90	159	129	149
S1_14	71	188	92	88	128	174	164	240	222	81	96	98	93	122	145	128	103	162	174	90	95	84	132	122	115	106	156	90	85	95	81	169	-9	122	219	165	200	159	84	159	125	171
S1_14	71	192	92	88	130	178	172	240	222	85	96	98	93	132	145	132	105	168	178	92	99	90	132	136	115	108	156	96	85	95	85	169	-9	128	219	187	204	163	84	159	127	207
S1_15	69	192	132	88	126	178	160	240	222	81	96	96	85	144	147	128	99	162	174	92	95	-9	132	128	111	88	152	88	89	101	87	161	161	126	217	159	200	163	88	159	127	145
S1_15	71	202	150	94	126	178	162	240	226	85	98	98	85	144	151	132	99	162	184	92	99	-9	132	132	111	102	152	90	89	117	89	173	161	126	217	161	214	167	88	159	149	171
S1_16	69	192	78	92	126	178	156	286	220	85	94	96	85	104	153	130	99	158	172	82	93	82	132	128	111	102	150	90	57	89	85	163	153	124	217	159	204	161	82	159	129	147
S1_16	69	198	100	94	134	178	170	286	222	85	98	96	99	126	153	134	107	160	178	100	95	82	138	134	129	104	152	96	59	89	91	173	189	128	217	171	204	165	86	159	131	151
S1_17	69	190	92	90	126	178	160	240	220	81	90	90	87	94	149	134	101	166	174	96	93	82	132	144	141	102	146	94	85	89	81	215	155	122	217	185	200	159	92	149	125	149
S1_17	71	202	116	96	132	178	192	282	224	85	100	98	89	152	149	134	101	176	178	98	97	82	132	174	145	102	154	94	87	121	81	231	155	130	217	185	204	163	92	157	127	153
S1_18	67	194	78	88	130	174	164	240	218	87	92	94	91	88	149	134	99	162	178	90	97	80	132	132	109	100	144	96	87	89	85	163	163	126	217	169	200	175	84	157	111	151
S1_18	69	202	78	90	136	178	186	240	222	87	94	96	95	168	169	134	107	162	188	98	97	86	132	134	121	104	168	100	89	89	85	165	163	128	217	169	200	181	86	157	131	161
S1_19	67	192	88	90	124	174	162	242	222	81	96	96	85	100	157	132	105	162	178	92	93	82	132	124	111	100	150	90	85	87	91	163	-9	122	217	169	202	165	84	149	127	147
S1_19	69	192	118	96	134	178	164	286	222	81	98	98	85	140	161	134	113	162	178	96	97	86	132	128	133	104	158	98	85	87	105	175	-9	128	217	171	204	173	88	159	127	151
S1_20	67	190	104	90	132	174	160	416	220	87	96	96	87	104	149	134	99	168	182	92	95	80	132	128	115	104	150	98	85	99	89	163	155	122	217	169	200	167	86	143	125	149
S1_20	79	192	114	92	136	174	162	440	222	87	98	98	87	118	153	134	107	168	182	98	95	80	132	130	123	104	154	100	85	107	89	185	155	128	217	183	206	171	86	161	129	153
S1_21	71	192	108	84	122	168	186	240	220	85	96	96	87	118	161	134	97	164	172	92	93	82	132	132	115	102	154	96	85	89	91	161	155	122	219	167	202	159	86	155	129	147
S1_21	71	192	148	92	122	178	192	242	222	87	96	98	89	136	169	134	99	170	172	92	93	84	132	132	117	102	154	98	87	101	97	161	155	122	219	171	204	173	86	159	131	169
S1_22	69	190	100	88	128	174	158	238	218	81	94	94	89	116	153	132	97	160	178	-9	99	-9	132	130	109	102	152	88	85	89	89	161	-9	124	217	159	200	161	84	155	129	149
S1_22	73	194	100	90	126	178	164	238	222	85	98	94	91	116	153	134	97	170	178	-9	109	-9	132	132	131	102	152	96	87	89	97	161	-9	124	217	171	202	175	94	155	131	153
S1_23	69	192	96	90	128	174	160	238	218	81	94	96	93	92	155	132	101	162	176	92	93	-9	132	124	109	102	146	100	85	89	85	169	155	124	217	173	204	155	86	153	129	139
S1_23	69	194	126	94	130	174	172	238	220	87	98	98	93	136	161	134	101	168	178	92	103	-9	132	132	109	102	152	100	85	93	113	173	155	124	217	185	204	159	96	157	129	147
S1_24	67	192	82	94	126	174	162	238	222	81	94	96	85	130	145	132	101	168	172	90	95	84	132	132	111	100	148	98	85	89	87	173	159	124	219	165	204	171	88	159	129	149
S1_24	71	210	82	96	136	178	172	238	222	85	94	96	87	156	157	134	109	172	178	94	95	84	134	134	111	104	148	98	85	89	89	173	165	124	219	167	204	209	88	159	129	173
S1_25	67	192	88	88	130	174	162	274	220	81	96	96	83	124	159	134	97	160	178	96	93	84	132	132	111	102	150	98	85	93	85	167	159	122	219	157	196	155	84	159	129	147
S1_25	73	198	114	92	132	178	168	274	222	85	98	98	87	124	159	136	101	168	178	98	93	84	132	132	131	104	152	98	85	95	89	167	159	126	219	159	226	169	90	159	131	151
S1_26	71	222	114	90	132	174	160	238	220	81	94	96	83	98	145	132	93	160	-9	92	97	-9	138	136	119	104	152	90	87	91	85	167	157	122	215	169	202	163	86	157	129	161
S1_26	77	224	114	94	138	174	172	308	220	87	94	96	87	202	159	134	99	168	-9	98	97	-9	142	146	153	106	154	90	87	91	85	179	159	122	217	185	204	173	86	157	129	165
S1_27	67	192	166	94	128	-9	162	238	-9	71	94	-9	83	130	149	-9	97	-9	-9	90	103	-9	-9	130	111	88	152	88	87	89	87	-9	-9	-9	-9	-9	198	-9	84	151	111	-9
S1_27	69	196	166	94	132	-9	166	238	-9	89	94	-9	87	164	157	-9	99	-9	-9	106	109	-9	-9	140	123	102	156	96	89	89	89	-9	-9	-9	-9	-9	212	-9	86	159	131	-9
S1_28	67	194	82	92	128	174	162	242	222	81	94	94	87	116	151	132	97	162	172	98	93	88	-9	128	109	100	150	88	85	87	83	167	-9	124	215	169	204	155	90	157	129	155
S1_28	71	210	132	92	134	178	174	274	224	87	98	98	87	116	155	134	111	166	178	98	95	92	-9	132	109	110	150	98	85	97	91	187	-9	124	217	171	206	165	96	157	131	165
S1_29	67	192	92	92	124	178	162	286	206	85	94	98	95	140	161	128	99	162	172	94	81	82	132	126	109	102	150	88	87	89	81	167	165	124	219	167	204	161	92	159	127	147
S1_29	67	198	104	94	128	178	164	286	220	87	94	98	97	160	169	140	107	170	184	98	95	90	132	130	117	102	156	90	87	89	85	167	173	124	219	171	204	163	94	159	129	153
S1_30	67	194	150	88	128	174	152	274	222	81	94	96	85	92	147	132	103	162	176	110	93	-9	132	128	111	102	148	90	89	89	91	169	-9	124	219	169	202	163	86	157	127	147
S1_30	69	196	186	90	140	178	170	298	222	87	96	96	87	152	161	132	107	172	176	112	97	-9	132	140	111	102	152	98	119	89	91	173	-9	124	219	187	212	193	86	157	127	165
S1_31	67	192	88	90	130	174	162	242	222	81	94	96	93	76	145	128	99	156	-9	94	81	82	132	120	109	102	150	96	85	89	93	169	153	122	215	-9	200	159	86	159	125	153
S1_31	69	198	116	90	130	174	162	286	224	87	94	98	95	136	163	132	99	158	-9	94	99	86	132	132	117	104	162	98	87	95	93	171	187	128	217	-9	204	167	86	159	127	157
S1_32	69	188	90	92	126	172	160	240	220	81	94	96	89	90	151	134	103	162	-9	88	93	82	-9	130	111	100	144	94	87	89	81	163	155	-9	217	169	202	157	86	159	129	153
S1_32	71	194	144	94	138	174	170	242	222	85	96	96	99	90	155	136	109	170	-9	92	95	86	-9	142	121	102	150	104	143	89	81	169	183	-9	217	169	204	163	86	159	131	163
S1_33	69	194	88	86	124	178	160	-9	224	81	94	98	87	114	145	130	99	162	174	82	95	80	132	132	129	104	150	90	87	87	85	185	153	128	217	169	204	159	92	157	129	155
S1_33	69	208	158	90	126	178	164	-9	224	81	96	98	113	164	147	138	99	168	174	90	101	84	132	148	129	104	150	98	111	89	91	187	185	128	217	169	206	161	96	157	131	171
S1_34	69	194	106	88	124	178	162	254	220	85	94	96	83	146	151	134	101	156	172	94	95	86	-9	130	109	102	150	92	87	95	85	177	165	124	219	183	202	169	86	159	125	147
S1_34	71	194	106	88	124	178	170	254	224	85	98	96	85	150	151	134	105	170	172	98	97	88	-9	130	109	102	152	96	89	95	91	177	165	124	219	187	204	171	88	159	131	151
S1_35	69	190	90	90	124	174	160	242	220	71	94	96	101	130	149	134	99	158	176	88	93	82	-9	120	111	102	154	90	85	89	85	163	155	122	217	191	200	163	82	159	129	147
S1_35	73	196	104	90	128	178	164	278	222	89	96	96	103	144	153	134	99	170	176	92	95	82	-9	138	127	102	156	90	87	91	85	165	157	122	217	191	204	169	88	159	129	155
S1_36	69	186	100	90	128	174	158	246	222	81	94	92	85	90	149	132	97	164	172	90	95	84	132	130	111	88	150	90	85	87	89	165	157	124	217	169	196	171	88	159	129	149
S1_36	71	196	114	94	134	178	186	246	224	85	94	96	111	158	153	134	109	168	180	92	95	86	132	154	123	102	152	102	85	87	91	179	157	128	217	173	202	171	88	165	131	157
S1_37	69	192	116	90	130	174	158	248	220	81	94	96	87	112	151	132	99	170	172	92	93	82	132	130	113	102	150	94	85	87	91	161	165	122	217	167	204	163	84	159	123	157
S1_37	69	218	148	92	140	178	160	248	222	81	96	96	109	126	175	134	99	184	178	98	101	86	132	130	129	102	176	94	87	103	91	161	167	128	217	169	220	171	90	159	131	161
S1_38	69	190	110	88	128	-9	160	234	-9	85	94	-9	83	122	151	-9	99	-9	-9	-9	93	-9	-9	128	109	102	150	96	85	89	91	-9	-9	-9	-9	-9	-9	-9	92	159	111	-9
S1_38	71	190	110	102	132	-9	162	288	-9	85	96	-9	89	132	151	-9	99	-9	-9	-9	99	-9	-9	144	117	102	152	98	87	89	91	-9	-9	-9	-9	-9	-9	-9	96	159	125	-9
S1_39	71	194	82	90	122	174	164	282	218	81	94	92	87	130	149	132	99	158	182	90	95	80	132	128	109	102	148	88	85	89	89	161	157	124	217	161	200	163	86	147	125	149
S1_39	71	198	160	92	124	178	184	282	224	81	98	96	89	146	153	132	107	170	182	92	99	90	132	134	109	108	180	98	87	89	109	187	167	124	217	169	204	165	88	161	129	157
S1_40	67	196	82	90	124	174	160	240	222	81	94	96	87	124	149	132	99	162	178	94	93	86	-9	130	109	86	152	102	87	87	89	165	157	-9	217	169	200	159	84	161	129	147
S1_40	71	224	102	96	128	178	164	240	224	85	98	96	91	130	149	134	107	170	180	98	97	86	-9	132	109	102	152	104	87	97	89	173	183	-9	217	169	206	159	88	161	129	157
S1_41	67	196	92	90	128	174	160	240	224	85	94	98	89	104	153	134	97	162	180	82	95	82	132	130	109	102	154	100	87	89	89	165	157	126	219	167	204	161	84	159	127	151
S1_41	67	200	108	92	152	174	172	242	224	89	94	98	89	104	155	134	105	170	186	82	95	88	132	134	109	102	156	104	87	95	97	187	175	128	219	169	204	169	88	159	129	159
S1_42	69	190	78	92	126	174	158	240	220	81	98	96	81	110	151	134	105	170	176	90	95	-9	132	132	103	100	148	90	85	89	83	169	157	122	217	185	202	159	84	157	131	147
S1_42	71	196	92	100	136	178	162	286	222	85	100	96	81	110	161	134	105	174	176	90	95	-9	132	146	109	108	152	106	85	89	85	179	157	122	217	185	204	163	90	157	133	175
S1_43	67	186	104	88	126	174	160	240	218	81	96	96	83	110	151	132	99	162	178	92	95	-9	134	124	115	104	148	98	85	91	89	173	-9	124	217	159	200	161	88	159	125	147
S1_43	73	208	104	92	130	178	162	242	220	89	96	96	89	110	153	134	107	164	180	92	99	-9	134	128	119	104	150	100	87	107	123	173	-9	124	217	159	202	209	88	159	125	151
S1_44	69	190	86	90	128	174	162	240	220	81	94	98	83	106	145	132	97	160	178	92	95	82	132	122	109	102	150	90	79	89	89	165	157	124	219	171	204	183	82	159	129	147
S1_44	71	196	104	96	152	174	178	248	222	85	96	98	99	124	159	134	97	162	180	98	95	86	134	130	111	102	150	100	85	89	89	165	159	128	219	173	204	183	92	159	131	165
S1_45	71	198	76	88	128	174	152	242	222	87	94	90	83	112	153	130	97	164	178	92	93	86	132	124	121	102	148	96	85	89	89	161	163	124	217	167	196	167	84	161	129	149
S1_45	71	206	98	90	130	178	164	286	222	87	96	96	83	120	153	130	99	168	178	96	95	90	132	134	113	102	148	98	89	109	89	165	163	124	217	187	200	169	84	161	131	149
S1_46	67	190	110	94	124	174	158	240	218	81	94	90	83	114	147	134	95	162	176	98	93	88	132	132	107	102	146	96	85	89	89	185	167	124	217	167	200	171	90	161	129	183
S1_46	71	194	172	96	136	178	162	240	224	87	98	98	93	126	147	136	99	162	184	98	95	88	132	146	109	104	152	96	85	107	89	185	199	124	217	187	200	171	94	161	131	187
S1_47	71	196	136	88	126	174	164	240	222	81	94	94	87	100	167	134	97	160	172	82	95	84	138	124	107	88	148	94	85	89	85	167	157	122	217	169	200	157	90	159	127	161
S1_47	71	206	174	94	128	178	180	240	224	81	94	96	107	146	161	134	97	168	178	98	95	88	138	126	107	104	148	100	87	103	91	189	163	126	217	171	200	157	98	159	131	163
S1_48	71	194	112	88	126	174	164	240	218	85	96	96	81	126	147	132	101	166	176	90	91	82	132	126	107	102	148	100	85	87	85	165	153	122	219	159	202	161	84	157	129	169
S1_48	71	216	112	96	152	178	164	274	222	87	96	100	87	144	151	134	101	168	176	96	93	90	138	134	127	106	150	100	87	89	87	167	199	124	219	165	204	163	84	157	129	169
S1_49	71	194	96	94	126	174	154	240	220	85	94	96	85	110	151	134	101	164	176	92	101	82	132	128	111	100	152	98	85	87	85	165	-9	128	217	167	204	161	88	145	131	147
S1_49	71	196	102	96	128	174	164	240	222	87	98	98	117	110	153	134	101	192	176	92	109	90	132	134	111	104	152	104	87	87	89	169	-9	128	217	171	204	161	92	157	131	169
S1_50	67	192	104	94	132	178	160	242	222	81	92	96	83	120	145	134	101	162	176	92	93	84	-9	110	107	90	152	90	85	91	89	181	155	122	217	161	198	165	86	159	129	151
S1_50	69	220	110	96	130	178	162	242	224	87	94	96	83	152	147	134	109	174	176	94	95	86	-9	132	139	100	152	100	89	97	95	187	155	122	217	171	202	175	86	159	131	155
S1_51	69	188	90	92	110	174	166	240	222	85	94	96	83	118	153	132	107	164	176	-9	93	-9	132	126	109	102	152	96	85	101	85	169	161	-9	217	169	200	159	86	157	125	151
S1_51	69	198	110	94	124	178	168	242	222	87	94	98	85	138	155	134	113	172	178	-9	99	-9	132	132	117	104	156	98	85	103	89	169	189	-9	217	185	204	177	94	165	131	151
S1_52	69	190	88	98	132	174	160	218	222	81	96	96	83	110	151	134	107	166	178	92	95	82	132	126	107	100	152	94	85	89	91	181	163	122	217	167	200	161	84	159	111	147
S1_52	71	198	126	98	140	174	160	282	222	87	96	98	83	134	151	134	107	170	180	98	95	86	138	126	111	102	152	96	87	89	91	183	163	122	217	169	204	197	84	159	133	159
S1_53	67	192	98	88	126	174	162	240	220	85	94	90	83	116	153	132	97	162	176	92	95	84	132	126	111	102	154	94	87	91	85	177	167	122	215	169	200	163	84	157	125	145
S1_53	69	196	106	96	128	178	172	240	224	85	94	94	85	142	153	134	97	162	178	92	109	88	138	180	115	108	166	98	89	95	99	187	173	122	217	171	206	169	88	157	131	157
S1_54	69	188	80	90	124	174	156	256	222	81	94	96	83	134	159	132	101	164	174	-9	95	-9	132	124	107	102	150	98	85	89	85	185	-9	124	217	165	194	163	92	157	127	141
S1_54	69	190	88	94	128	174	176	274	222	85	98	96	89	170	167	132	107	166	174	-9	95	-9	138	128	135	102	170	100	85	91	85	207	-9	126	217	169	200	207	96	157	131	151
S1_55	69	194	94	92	124	174	166	196	220	81	94	96	89	118	147	134	99	170	174	92	95	90	138	122	107	100	154	100	85	89	81	161	157	124	217	157	206	187	84	159	123	157
S1_55	71	204	140	96	130	174	166	238	222	85	98	96	93	120	153	134	105	172	174	92	95	90	138	124	107	104	198	116	89	97	89	185	157	124	217	169	206	189	86	159	131	157
S1_56	67	194	92	92	126	178	162	242	220	81	96	96	87	108	149	132	111	162	174	82	95	82	132	132	107	102	154	90	87	89	89	163	159	124	217	165	200	157	86	157	111	147
S1_56	71	196	102	94	126	178	164	242	220	85	96	98	87	136	149	134	111	192	174	94	95	82	136	134	119	102	168	102	89	89	93	181	167	126	217	173	236	169	94	157	127	161
S1_57	71	192	86	88	124	174	160	240	220	81	94	90	87	110	149	134	101	162	172	88	95	82	132	134	109	102	150	90	87	89	89	161	157	122	215	167	202	161	88	155	127	149
S1_57	73	202	90	90	128	178	172	240	222	87	96	96	89	162	153	136	107	166	172	96	101	82	132	138	115	102	150	96	87	101	89	173	157	122	217	171	204	163	88	155	129	149
S1_58	73	198	220	94	128	174	160	240	220	81	94	96	81	76	147	134	97	162	176	90	95	82	132	128	107	100	150	96	87	89	93	175	157	126	217	169	200	169	80	157	127	147
S1_58	75	216	220	96	130	174	164	240	220	85	94	96	81	132	153	136	107	164	176	90	95	90	138	130	119	102	150	108	89	89	93	175	159	126	217	169	204	171	92	157	129	155
S1_59	67	188	90	90	132	174	162	240	220	85	94	96	83	108	147	134	99	162	180	92	95	84	132	128	109	102	148	98	83	89	87	165	157	124	217	185	202	159	96	159	131	151
S1_59	71	194	110	94	132	178	162	252	222	93	94	96	83	126	147	134	107	164	180	92	97	92	132	134	115	102	180	100	85	89	89	169	157	124	217	191	204	161	96	159	131	151
S1_60	67	192	90	94	138	174	152	-9	206	81	96	96	81	102	153	132	99	162	178	92	99	80	132	126	111	102	150	84	85	89	89	165	157	122	215	169	200	159	84	157	127	147
S1_60	71	196	144	98	142	178	164	-9	222	85	96	96	89	114	161	134	99	170	178	96	101	80	138	126	111	102	150	108	85	97	89	177	157	128	217	185	210	169	104	159	129	179
S1_61	67	196	86	94	122	174	176	240	220	81	96	96	83	124	153	130	111	162	178	96	93	92	132	126	117	102	150	98	57	89	89	163	151	122	217	159	196	159	92	161	129	157
S1_61	71	200	88	98	134	174	190	240	224	99	96	96	83	150	159	134	119	164	178	96	93	92	132	132	121	104	150	100	59	89	111	167	155	128	217	167	204	171	94	161	129	157
S1_62	67	194	94	90	128	174	172	240	222	81	94	94	89	134	147	134	99	156	178	92	95	82	132	128	107	100	150	90	85	89	87	165	165	124	217	169	204	167	86	157	131	155
S1_62	67	196	128	92	132	180	172	272	224	81	96	98	91	148	155	134	103	164	178	92	95	90	138	138	117	102	154	90	85	95	89	187	165	124	217	169	204	173	116	161	131	157
S1_63	69	188	92	98	122	174	160	240	222	81	94	96	83	122	149	132	101	160	178	98	95	84	132	130	109	102	152	94	85	89	85	175	157	122	217	159	200	159	88	159	129	161
S1_63	71	190	118	98	144	178	184	240	222	87	98	96	85	144	155	134	103	170	178	102	99	90	132	130	113	108	154	96	85	91	85	203	185	122	217	167	202	175	100	159	131	165
S1_64	71	190	90	90	126	174	160	240	220	83	96	98	83	124	147	132	103	164	178	92	91	84	132	124	109	102	160	96	87	97	85	167	163	126	215	161	202	157	84	159	125	173
S1_64	73	204	124	98	142	174	178	282	220	85	98	100	87	164	153	132	107	172	178	98	95	88	138	124	119	108	160	96	87	103	85	169	163	128	217	163	206	165	84	159	127	187
S1_65	67	206	112	90	126	178	168	240	-9	71	94	92	83	118	147	-9	111	162	-9	-9	95	80	132	124	119	104	152	96	87	93	89	161	155	-9	215	167	200	165	86	159	131	147
S1_65	71	220	118	94	132	178	186	240	-9	89	94	102	93	124	159	-9	111	170	-9	-9	101	84	132	130	121	104	154	98	87	99	95	169	163	-9	217	169	206	189	90	159	133	159
S1_66	67	190	84	88	130	174	162	240	220	81	94	96	83	106	147	132	99	166	178	86	95	-9	132	134	111	100	154	96	85	89	83	167	-9	124	217	169	200	161	90	157	131	161
S1_66	67	194	104	94	130	178	168	240	222	87	96	96	83	132	161	134	109	170	178	94	95	-9	132	134	121	108	160	96	87	89	111	167	-9	124	217	169	200	163	90	157	131	161
S1_67	69	196	92	90	126	174	176	242	222	81	94	96	89	128	153	134	97	162	178	88	95	80	132	122	107	102	154	94	87	89	87	157	177	124	217	165	204	167	86	149	127	155
S1_67	69	202	122	90	130	174	188	242	222	81	94	96	89	146	153	134	99	172	180	92	95	84	132	128	111	108	154	94	87	89	89	161	177	128	217	169	224	175	92	161	129	159
S1_68	69	194	140	92	126	174	152	242	220	71	96	96	83	114	157	134	99	162	176	92	95	82	132	124	115	102	152	96	85	89	89	169	155	122	217	167	202	159	88	157	129	157
S1_68	71	208	178	94	134	174	154	278	222	81	98	96	95	130	167	134	111	174	178	92	99	82	136	130	119	106	152	96	85	91	91	169	163	122	217	187	220	195	92	157	133	181
S1_69	69	192	90	90	124	174	162	240	222	81	94	96	83	106	145	124	93	162	174	88	95	84	132	138	111	100	150	84	77	91	85	161	-9	120	217	161	204	165	84	159	129	151
S1_69	71	194	154	94	134	178	166	282	224	89	100	96	89	128	153	134	111	172	174	92	95	86	132	140	131	108	150	90	77	99	85	161	-9	120	217	187	206	167	92	159	129	157
S2_1	69	190	106	92	134	178	166	240	222	81	94	88	83	124	145	132	97	162	178	92	93	86	-9	110	107	100	150	98	87	89	89	161	149	122	217	159	204	161	84	159	125	151
S2_1	71	192	134	94	140	178	166	242	224	81	104	102	83	162	147	134	101	168	182	96	93	86	-9	126	107	106	158	98	89	97	89	161	159	124	217	171	206	177	88	159	129	157
S2_2	69	190	110	92	136	174	168	300	222	85	94	96	85	102	153	-9	101	166	-9	94	91	84	-9	128	109	102	154	90	87	91	85	163	167	122	215	165	204	161	86	159	125	151
S2_2	71	194	128	92	136	178	178	300	222	87	94	96	99	148	175	-9	109	176	-9	94	93	84	-9	132	109	102	168	98	91	91	93	163	169	122	217	167	204	169	90	159	129	153
S2_3	69	188	120	92	128	178	162	242	206	81	94	96	89	104	153	-9	99	166	178	92	93	84	-9	128	107	100	148	96	85	89	89	169	157	-9	217	165	198	161	90	161	115	161
S2_3	71	192	172	94	146	178	166	242	220	85	94	96	105	118	173	-9	109	174	178	98	101	84	-9	132	111	102	152	102	85	99	91	185	161	-9	217	169	204	167	96	161	131	167
S2_4	67	196	72	92	112	174	166	254	222	85	94	98	85	86	145	130	103	162	174	92	93	84	132	128	109	100	146	96	85	87	83	169	153	-9	219	169	204	173	86	161	123	145
S2_4	67	200	152	92	130	178	166	256	222	87	104	102	89	104	159	140	103	168	174	94	93	88	132	134	139	104	152	98	89	89	89	169	159	-9	219	169	204	183	88	161	125	167
S2_5	67	196	78	92	132	168	156	242	222	81	94	96	87	110	151	134	99	162	174	92	97	82	132	122	119	102	154	96	87	89	89	187	171	-9	217	169	200	161	92	159	125	149
S2_5	69	198	100	94	132	174	166	242	222	85	100	96	99	114	151	134	101	168	174	94	101	88	132	128	119	102	170	104	89	91	95	191	171	-9	217	171	202	163	92	159	131	155
S2_6	69	192	86	90	130	178	162	240	222	81	94	96	81	120	153	132	97	162	178	92	93	82	132	124	109	102	150	94	83	89	81	169	157	122	217	169	192	159	84	161	125	147
S2_6	71	194	96	92	132	178	162	240	222	85	94	100	85	128	167	132	103	170	178	94	93	88	132	150	111	106	158	94	85	109	85	175	157	130	217	185	202	197	84	161	131	153
S2_7	67	198	88	92	126	174	166	242	220	81	94	96	85	100	153	132	99	162	176	92	95	80	132	132	111	106	144	90	89	89	85	181	165	122	219	169	200	165	84	149	123	149
S2_7	81	198	98	92	132	174	176	242	222	81	100	96	87	106	153	132	101	186	178	96	101	84	132	132	113	108	150	90	89	89	89	193	165	124	219	185	204	165	84	159	129	151
S2_8	71	186	90	90	148	174	164	240	222	81	92	96	83	106	155	132	101	168	190	88	91	-9	132	134	107	102	148	90	87	97	85	179	159	122	217	169	204	159	90	157	125	149
S2_8	71	188	114	92	156	178	164	276	224	81	94	96	87	142	155	134	111	172	190	92	91	-9	138	134	111	102	152	96	89	103	93	183	161	122	217	173	208	161	94	157	131	155
S2_9	67	190	78	98	130	174	164	242	222	81	94	96	83	112	147	132	99	162	180	82	91	84	138	124	111	100	144	90	83	99	85	193	155	124	217	173	202	161	84	159	129	147
S2_9	71	196	88	98	144	174	164	266	222	87	94	98	87	146	151	134	99	186	180	98	93	84	138	130	111	102	154	98	87	103	89	205	165	124	217	185	202	167	84	159	129	155
S2_10	69	196	90	88	140	174	156	240	218	81	94	96	85	100	-9	-9	97	166	-9	-9	91	80	-9	132	107	100	152	98	87	85	87	167	-9	122	217	165	202	163	84	149	129	157
S2_10	71	198	138	92	150	174	168	278	224	81	100	96	89	100	-9	-9	105	168	-9	-9	95	84	-9	136	133	100	170	102	89	89	91	179	-9	122	217	169	202	163	92	159	129	163
S2_11	69	182	100	94	124	174	166	240	222	81	94	96	85	92	151	134	99	162	178	92	93	86	-9	124	107	100	148	94	87	89	85	167	-9	122	217	167	196	171	84	161	129	139
S2_11	69	194	106	94	130	174	180	242	224	81	96	98	91	96	153	138	101	164	180	96	93	92	-9	132	113	102	158	96	89	95	89	171	-9	122	217	187	200	195	84	161	131	149
S2_12	69	192	98	98	128	174	164	240	220	81	94	96	83	122	151	132	97	162	178	88	93	82	-9	124	107	102	146	96	85	89	87	167	167	-9	219	169	202	159	96	157	123	147
S2_12	69	194	104	98	130	178	172	276	222	85	98	96	99	170	157	134	99	170	178	96	97	88	-9	128	113	108	156	104	85	103	95	167	169	-9	219	169	210	169	100	159	129	147
S2_13	67	192	78	94	130	174	162	250	222	81	94	96	83	108	147	132	99	160	178	88	91	80	-9	128	113	102	150	94	85	87	81	167	167	126	-9	169	196	163	88	159	127	155
S2_13	67	216	94	94	144	178	190	282	222	85	100	96	83	118	169	134	113	164	178	88	91	80	-9	134	125	102	154	100	85	97	93	195	167	126	-9	169	200	175	96	165	127	189
S2_14	67	194	88	90	132	174	162	250	222	81	98	96	83	106	149	128	97	164	174	88	91	80	-9	130	109	102	148	90	85	89	85	225	155	-9	217	167	196	175	88	157	131	147
S2_14	69	202	98	94	132	178	166	286	222	87	98	96	85	148	149	134	97	168	178	96	91	84	-9	130	111	108	182	94	85	91	87	225	167	-9	217	169	200	191	88	161	131	189
S2_15	67	190	100	98	126	174	162	240	220	81	94	96	81	124	157	132	99	164	176	-9	91	82	-9	128	115	100	154	98	89	91	83	161	173	124	219	191	206	155	82	157	131	147
S2_15	71	198	100	98	150	178	166	240	222	89	98	100	81	136	157	134	113	192	178	-9	109	86	-9	134	139	100	156	98	119	91	89	167	199	124	219	191	226	161	96	161	131	169
S2_16	67	196	98	90	128	174	164	196	222	81	92	96	85	114	149	132	97	168	178	92	91	82	134	132	123	100	152	96	87	89	89	165	155	122	215	159	198	159	82	159	129	159
S2_16	71	226	136	100	130	178	168	300	222	85	94	104	101	132	153	134	99	168	180	100	95	94	134	138	135	100	154	106	87	101	91	179	161	122	217	159	204	175	82	159	131	167
S2_17	67	192	124	94	128	174	164	240	206	87	94	92	83	134	153	130	99	162	178	88	93	86	132	124	119	102	154	94	83	89	91	161	201	124	217	169	210	159	92	161	125	147
S2_17	71	192	182	98	132	178	170	276	222	87	96	94	85	156	153	134	99	170	178	88	93	88	140	134	137	102	154	96	85	89	129	191	201	130	217	171	222	165	96	161	131	149
S2_18	67	210	86	90	124	174	166	244	218	81	94	-9	89	104	149	134	105	162	176	92	99	82	132	128	115	102	150	90	85	91	89	161	161	122	219	169	202	165	84	159	131	151
S2_18	75	216	154	90	142	174	168	288	222	87	96	-9	89	128	153	134	111	168	180	98	99	86	132	128	131	108	152	98	87	97	93	175	179	128	219	169	204	171	88	159	133	157
S2_19	69	190	94	90	138	174	164	240	220	81	94	98	83	78	153	132	99	162	174	92	91	82	-9	128	111	102	152	96	87	93	85	163	-9	122	219	159	200	165	84	159	131	151
S2_19	71	196	96	96	138	174	164	244	220	87	96	98	87	168	153	134	111	166	176	92	93	92	-9	132	115	102	152	98	91	103	89	187	-9	124	219	165	204	171	86	159	133	181
S2_20	67	194	92	90	126	174	166	240	222	81	94	98	87	104	151	132	99	162	-9	88	91	-9	-9	124	109	102	150	96	89	89	89	165	167	122	217	165	204	169	88	159	127	149
S2_20	71	200	130	92	126	174	184	288	222	87	94	98	87	144	153	132	105	162	-9	92	109	-9	-9	132	109	108	150	98	89	89	107	165	185	122	217	165	218	169	90	159	133	159
S2_21	67	184	88	92	132	174	160	244	222	81	94	96	85	140	147	134	99	160	174	82	91	82	-9	124	109	100	148	90	87	89	83	161	157	122	219	169	200	161	86	149	127	147
S2_21	69	190	122	94	132	178	162	288	224	87	94	96	87	140	151	138	101	164	178	82	109	88	-9	134	109	102	148	90	87	89	89	161	187	122	219	171	204	167	92	159	127	149
S2_22	65	200	90	94	128	174	156	276	206	81	96	88	83	136	147	134	101	162	174	92	93	84	126	126	107	90	148	96	83	89	89	165	155	122	217	159	202	159	86	159	125	147
S2_22	73	204	116	98	132	178	168	276	220	87	96	96	87	164	149	134	111	162	174	92	93	88	136	128	109	102	148	102	89	89	91	189	155	122	217	169	202	159	92	161	129	167
S2_23	71	192	106	94	126	174	162	184	220	81	94	96	85	120	149	130	97	162	180	96	93	80	132	130	107	102	150	90	89	89	89	163	159	122	219	169	196	157	88	157	129	149
S2_23	73	192	106	96	126	178	166	250	222	83	94	96	85	134	151	130	97	168	180	98	109	90	138	130	117	108	156	96	91	89	89	165	159	124	219	171	200	161	88	157	129	149
S2_24	67	190	90	90	126	174	164	240	222	81	96	100	83	118	151	132	101	162	178	92	91	88	132	122	109	102	154	90	85	89	85	161	163	124	217	159	204	165	96	159	129	161
S2_24	69	196	96	90	130	174	168	284	222	85	98	100	85	148	155	134	105	164	178	100	93	96	134	136	109	106	170	96	87	89	111	167	189	126	217	169	206	165	96	161	131	167
S2_25	67	190	76	92	134	174	164	240	222	83	94	98	89	106	147	134	107	164	174	88	97	82	132	126	107	100	146	88	87	87	91	161	153	122	219	163	204	159	88	157	127	177
S2_25	69	196	102	94	136	178	196	274	224	87	94	98	89	118	153	140	111	168	174	92	99	92	138	134	137	102	150	108	87	89	91	165	193	128	219	167	206	169	88	159	129	197
S2_26	69	204	90	96	118	174	164	240	206	85	94	96	83	94	147	132	103	162	174	88	93	82	-9	132	113	102	150	100	85	89	85	-9	-9	122	-9	171	202	-9	88	161	131	179
S2_26	69	218	120	96	130	178	168	244	222	87	94	96	87	120	155	134	103	172	174	100	97	90	-9	132	131	102	154	102	89	89	87	-9	-9	122	-9	171	204	-9	88	161	133	179
S2_27	67	192	94	92	136	174	164	244	222	81	94	98	83	100	153	134	97	162	174	82	95	84	130	128	119	102	148	96	87	89	89	165	157	126	219	169	202	175	82	159	129	147
S2_27	73	192	106	94	144	178	166	244	224	85	96	98	85	162	157	134	101	162	184	82	95	86	130	134	123	108	148	100	87	89	91	165	157	126	219	169	204	193	94	159	129	151
S2_28	71	192	92	92	112	174	166	188	222	83	94	96	83	120	157	134	99	162	178	92	95	82	130	132	117	104	150	96	89	89	83	167	153	122	219	165	200	161	86	159	127	147
S2_28	73	194	92	94	132	174	178	240	224	85	98	96	85	136	169	138	103	192	184	96	109	82	130	136	153	104	152	98	123	113	87	167	153	122	219	169	204	191	94	159	129	171
S2_29	69	190	76	92	128	178	158	244	220	81	90	96	85	108	149	132	99	160	176	90	93	82	134	128	107	102	150	96	85	89	89	161	187	124	217	169	200	159	84	157	127	147
S2_29	69	192	82	92	134	178	166	244	222	85	94	96	85	116	153	134	111	164	178	96	95	88	136	128	121	106	152	96	87	89	99	175	187	128	219	189	202	159	90	159	129	157
S2_30	69	190	86	90	116	174	162	244	206	81	94	96	83	104	153	134	101	170	178	98	97	84	130	122	107	100	150	90	85	89	83	163	197	122	217	169	200	183	84	157	129	151
S2_30	69	192	118	98	122	174	182	284	222	81	98	96	85	126	155	134	111	182	178	100	109	86	138	132	109	100	150	102	85	93	113	197	203	126	217	169	202	193	86	159	129	167
S2_31	67	188	98	92	130	174	164	240	220	81	94	96	83	102	147	132	105	162	172	92	97	86	138	126	107	102	148	96	85	89	87	183	155	126	219	169	200	161	90	157	129	147
S2_31	71	192	152	92	132	178	166	240	224	87	98	98	89	132	157	134	105	166	176	94	99	86	138	126	121	102	160	96	89	107	89	185	155	128	219	193	204	165	90	159	133	157
S2_32	69	192	88	92	130	178	164	238	222	85	94	96	83	124	153	132	97	156	178	82	91	82	136	110	107	100	154	96	77	89	89	165	157	122	219	185	202	155	92	149	129	159
S2_32	71	196	120	94	136	178	166	304	224	87	96	96	87	124	153	134	99	164	178	82	107	84	142	128	107	110	166	96	77	97	91	165	181	126	219	185	204	163	110	161	131	159
S2_33	71	190	100	90	122	178	154	240	218	81	92	96	83	86	151	140	99	160	172	90	91	88	130	130	113	102	152	94	85	89	85	159	157	124	219	159	204	163	86	157	127	147
S2_33	73	194	122	98	148	178	182	288	224	81	94	96	89	116	153	140	101	168	172	92	95	88	130	130	133	106	156	102	87	91	91	169	157	124	219	163	204	163	88	157	127	155
S2_34	69	192	90	86	132	174	162	240	220	81	94	96	81	120	153	134	99	160	174	92	97	84	-9	128	107	104	148	94	85	89	89	179	159	124	-9	185	196	159	88	157	127	157
S2_34	71	194	110	86	148	178	164	250	222	85	98	96	87	146	153	134	105	162	180	96	101	90	-9	128	111	108	152	96	89	91	91	187	171	128	-9	187	196	171	88	159	131	167
S2_35	71	190	86	92	126	174	164	286	222	81	94	96	85	94	151	128	103	162	176	92	93	80	-9	128	111	100	152	94	87	89	87	161	155	126	-9	167	204	171	84	159	127	147
S2_35	71	246	112	94	138	178	166	286	222	85	96	96	87	124	167	128	105	162	178	96	93	86	-9	128	111	102	154	96	91	89	89	161	155	128	-9	167	204	207	88	159	129	167
S2_36	69	192	100	92	128	174	166	240	222	81	94	98	83	102	149	134	97	164	178	96	91	86	-9	132	109	100	150	100	85	101	85	159	157	124	-9	169	200	165	88	157	123	151
S2_36	69	198	102	92	132	174	180	244	222	87	96	98	87	102	155	134	109	164	178	96	93	86	-9	140	119	102	154	106	87	103	89	165	171	124	-9	169	206	165	88	157	129	157
S2_37	71	192	94	94	126	174	160	240	206	81	92	96	83	114	151	132	99	164	174	96	93	82	-9	126	107	106	152	90	83	87	89	193	155	126	219	165	196	167	84	159	129	149
S2_37	77	198	106	98	136	178	168	276	224	81	98	98	85	128	153	132	105	168	174	98	95	84	-9	140	119	108	160	92	89	97	97	209	155	128	219	169	200	177	88	161	129	169
S2_38	67	192	98	90	126	174	162	240	222	81	94	96	85	106	155	132	101	162	172	82	93	82	-9	134	111	100	148	90	85	87	89	161	159	124	219	165	200	169	84	159	129	145
S2_38	67	192	100	102	134	174	168	240	222	85	96	96	85	136	169	134	103	168	176	98	95	92	-9	134	115	100	156	102	87	91	95	179	167	128	219	169	222	181	88	161	131	151
S2_39	69	188	90	96	128	174	160	240	222	85	94	96	83	120	159	134	97	162	178	82	93	88	-9	126	109	102	154	90	87	87	89	177	159	124	219	169	196	159	86	159	127	149
S2_39	69	188	104	98	140	178	168	288	222	87	96	98	93	136	159	136	105	162	178	96	93	90	-9	126	165	106	154	96	87	89	89	187	179	128	219	187	204	161	92	159	127	163
S2_40	73	192	74	88	152	174	160	240	222	85	94	94	85	106	153	132	93	168	176	96	91	82	-9	126	107	102	146	90	87	87	85	163	-9	122	217	169	204	159	90	159	125	147
S2_40	73	196	102	96	152	178	162	288	226	87	98	96	87	106	153	134	95	172	178	98	109	84	-9	126	121	108	152	94	87	89	91	177	-9	122	217	171	206	165	92	159	129	151
S2_41	71	194	94	90	112	174	158	244	220	81	98	94	87	96	155	134	97	166	178	96	93	88	-9	126	107	102	146	96	85	97	87	161	157	124	217	171	204	157	82	157	127	147
S2_41	71	206	116	96	128	178	180	244	220	87	98	94	99	124	165	134	105	168	178	98	93	92	-9	138	115	108	150	96	87	103	93	177	159	124	219	187	204	171	82	157	129	149
S2_42	67	192	78	94	128	178	164	266	220	81	94	96	83	96	151	134	99	168	178	96	91	84	-9	128	103	100	146	90	85	87	83	161	157	124	219	167	196	165	86	143	125	147
S2_42	71	206	98	98	130	178	184	266	222	81	94	98	83	136	157	134	115	168	180	96	95	92	-9	130	121	102	150	98	85	91	87	165	159	126	219	167	200	167	92	159	125	171
S2_43	71	192	94	90	132	174	164	244	206	81	96	88	83	116	147	132	97	162	174	92	93	82	-9	128	107	100	148	90	93	89	85	161	161	124	217	159	200	163	84	159	129	155
S2_43	71	256	114	92	132	178	198	244	210	85	96	98	91	134	153	136	103	188	178	96	101	88	-9	132	111	102	148	106	93	91	89	167	181	124	217	169	202	191	96	159	135	163
S2_44	69	188	72	94	132	178	168	240	220	81	94	98	81	122	151	124	97	156	174	96	93	82	-9	130	109	100	146	90	87	87	83	189	163	124	219	161	204	159	84	161	129	155
S2_44	71	198	86	98	134	178	176	240	224	81	98	98	85	152	155	134	97	170	176	98	93	92	-9	130	113	102	156	100	89	97	93	189	191	124	219	167	204	181	90	161	129	167
S2_45	69	192	106	94	118	174	164	266	-9	81	94	94	83	126	155	132	97	168	-9	96	91	88	-9	130	109	100	150	94	87	89	85	175	157	122	219	161	204	157	84	159	129	151
S2_45	71	194	142	98	140	178	188	266	-9	85	96	94	93	134	163	132	105	172	-9	98	109	92	-9	130	113	108	150	102	89	103	85	175	165	126	219	167	210	187	84	159	133	167
S2_46	71	188	104	90	130	174	178	240	222	81	92	94	89	102	155	132	99	162	-9	96	93	90	-9	130	107	102	148	98	83	87	89	165	155	124	-9	-9	198	173	84	155	129	149
S2_46	73	190	144	94	140	174	188	266	222	85	94	94	89	130	157	132	103	166	-9	98	95	92	-9	132	129	102	158	102	85	89	95	165	155	130	-9	-9	198	173	90	157	129	157
S2_47	69	190	114	92	134	178	166	240	222	85	94	98	85	92	147	134	97	164	-9	94	93	82	-9	128	107	106	150	96	85	89	83	163	155	124	217	167	200	163	84	155	127	149
S2_47	71	198	128	96	150	178	176	276	224	87	94	98	85	106	159	134	99	166	-9	96	95	88	-9	128	109	108	152	96	85	91	85	175	155	126	217	169	204	169	90	161	127	149
S2_48	69	192	86	98	132	174	212	240	-9	81	96	98	81	120	147	134	99	160	-9	94	93	84	-9	126	107	100	146	90	89	89	91	165	159	122	217	173	202	163	82	159	131	155
S2_48	71	196	90	98	152	174	214	276	-9	81	96	98	87	136	159	138	99	166	-9	96	93	90	-9	132	113	102	152	94	93	91	93	175	159	122	217	187	204	171	82	159	131	165
S2_49	69	194	88	92	132	174	166	240	218	71	98	96	83	118	147	132	103	162	-9	96	93	84	-9	124	111	102	148	88	85	89	93	171	159	124	219	159	204	163	84	149	125	159
S2_49	71	198	184	92	132	174	190	300	222	81	100	96	87	182	157	132	103	170	-9	98	93	92	-9	124	117	102	160	88	87	91	97	171	161	124	219	171	204	165	90	161	127	171
S2_50	67	190	102	92	128	174	166	276	206	81	94	96	81	132	149	132	99	164	176	92	93	82	130	124	107	102	148	90	83	89	85	165	-9	124	219	167	202	161	88	147	127	167
S2_50	71	202	102	96	132	178	180	276	222	87	94	96	85	152	169	134	103	170	184	96	109	88	138	128	111	108	158	100	87	89	85	217	-9	130	219	167	204	191	92	147	129	169
S2_51	67	188	100	-9	132	178	162	242	218	81	92	96	83	106	163	134	97	162	176	92	95	82	-9	124	107	100	154	98	85	93	89	163	157	124	219	169	204	173	92	157	127	155
S2_51	71	192	108	-9	144	178	164	276	222	85	94	100	85	150	173	134	99	174	184	96	95	84	-9	128	111	100	156	100	85	97	95	165	189	126	219	169	204	195	100	157	129	169
S2_52	67	188	86	92	130	174	154	240	206	81	96	96	87	100	149	132	111	168	172	92	93	84	130	146	111	102	150	90	85	89	85	231	169	122	219	167	200	175	90	149	127	147
S2_52	71	194	90	98	166	178	162	240	222	87	98	102	87	134	161	134	111	168	184	96	93	88	130	146	111	102	162	110	89	89	111	231	187	122	219	171	204	183	92	157	133	169
S2_53	69	190	100	90	126	-9	162	240	218	71	94	90	83	136	153	-9	99	-9	-9	96	93	84	-9	126	109	102	146	90	83	89	85	-9	155	122	-9	-9	200	-9	86	147	111	157
S2_53	71	196	112	98	128	-9	164	286	222	85	96	96	85	152	155	-9	107	-9	-9	98	109	86	-9	132	113	102	164	96	87	91	91	-9	159	126	-9	-9	210	-9	86	157	125	167
S2_54	65	192	94	92	128	174	156	240	220	81	90	96	83	112	147	134	105	158	178	96	93	84	-9	130	109	100	144	90	87	89	85	165	159	124	219	163	202	161	88	155	127	161
S2_54	67	196	108	98	134	178	186	240	222	81	92	98	85	124	149	134	111	162	180	98	95	88	-9	140	111	102	192	98	87	95	91	169	171	126	219	163	204	161	88	159	133	171
S2_55	71	192	74	90	132	178	164	240	222	71	94	98	85	140	151	132	101	162	174	82	93	86	-9	128	117	104	146	94	85	87	83	169	155	122	219	159	204	165	88	155	127	167
S2_55	81	196	116	94	134	178	170	240	222	81	96	98	87	206	153	134	111	172	176	96	97	92	-9	128	129	108	152	96	87	89	89	169	155	128	219	159	220	167	92	155	129	183
S2_56	69	192	92	88	130	174	162	238	202	81	94	98	85	112	147	128	99	160	-9	92	99	84	-9	126	107	104	148	100	85	89	85	163	157	124	219	169	200	163	88	155	125	147
S2_56	71	200	106	94	154	178	166	246	206	87	96	98	87	122	153	132	105	168	-9	96	101	86	-9	126	107	104	150	104	85	89	113	171	163	126	219	171	204	171	90	157	127	159
S2_57	71	188	88	98	126	174	172	240	216	85	94	98	87	108	153	-9	99	166	-9	96	91	88	-9	130	107	88	146	96	91	89	83	165	157	126	-9	169	202	159	86	151	127	147
S2_57	71	190	108	98	128	174	174	240	220	85	96	98	87	108	155	-9	105	166	-9	98	93	90	-9	134	133	100	154	100	91	89	89	175	157	126	-9	169	204	173	90	161	129	149
S2_58	69	194	220	90	130	174	162	242	218	81	94	94	83	94	147	134	103	160	-9	96	91	86	-9	130	111	102	148	98	85	87	81	169	157	124	-9	167	204	163	90	159	125	149
S2_58	71	200	222	90	144	174	168	270	220	85	96	96	95	174	153	136	105	164	-9	98	93	90	-9	132	125	102	154	100	87	89	83	169	163	124	-9	167	204	165	96	159	135	157
S2_59	69	192	92	88	130	178	162	240	220	85	94	96	85	102	149	134	99	156	178	92	93	86	136	118	109	100	146	96	85	89	93	165	157	126	215	171	200	163	90	159	129	151
S2_59	73	220	108	94	146	178	166	248	222	87	96	96	93	116	153	134	105	176	180	96	93	90	136	136	111	104	152	104	89	99	93	167	161	128	217	191	200	163	90	159	131	173
S2_60	71	192	96	90	122	174	168	276	216	81	94	96	85	112	145	134	99	162	172	98	93	82	130	134	125	102	152	90	85	89	83	173	157	124	217	167	200	161	84	161	127	149
S2_60	79	200	96	98	134	174	186	294	218	85	98	96	85	142	145	134	101	168	174	98	93	82	130	134	125	102	190	96	89	91	85	191	159	130	217	185	206	187	96	161	131	181
S2_61	71	192	84	94	142	174	160	244	222	81	96	94	85	126	153	132	99	162	176	98	93	86	130	122	111	100	150	100	85	91	81	161	163	124	217	169	202	167	90	161	127	149
S2_61	71	196	114	98	142	174	186	276	224	85	96	98	97	126	153	132	99	168	186	98	93	90	130	122	143	104	152	100	89	91	83	163	167	124	219	171	204	175	90	161	129	149
S2_62	69	192	74	88	130	174	164	240	220	85	92	96	87	100	147	134	97	164	178	98	93	84	130	124	111	102	152	98	85	87	85	165	157	128	219	161	200	157	84	157	125	177
S2_62	71	208	82	96	142	178	164	240	222	85	98	98	91	116	149	134	97	166	180	98	97	86	130	140	125	102	154	100	85	89	85	209	157	128	219	161	200	169	92	157	127	179
S2_63	67	186	84	90	138	178	164	244	206	85	94	94	95	104	145	136	99	166	174	96	81	84	-9	124	123	102	150	92	85	89	85	169	157	124	-3	165	198	161	86	157	131	161
S2_63	71	198	96	92	138	178	168	244	220	87	96	94	95	130	159	136	103	174	178	98	81	84	-9	136	127	106	164	92	89	89	89	185	161	126	-3	169	204	167	86	159	131	167
S2_64	67	190	114	96	114	178	166	238	222	71	94	96	85	108	147	134	99	162	174	96	97	82	-9	134	109	102	148	96	83	89	89	165	-9	124	-3	167	204	159	86	159	129	149
S2_64	71	220	114	98	128	178	166	288	222	85	96	96	85	164	157	134	99	168	174	100	101	86	-9	134	113	102	150	98	83	95	89	181	-9	128	-3	167	204	173	86	159	129	149
S2_65	69	194	78	92	124	174	166	240	222	81	94	90	87	126	151	130	99	164	174	96	103	86	-9	158	109	102	152	98	85	89	91	161	155	126	219	185	202	163	84	151	129	175
S2_65	69	194	88	92	130	174	170	242	224	89	100	96	91	126	157	132	105	166	178	98	109	90	-9	158	113	102	198	100	85	91	91	165	155	126	219	187	202	183	92	159	131	197
S2_66	69	186	110	90	130	174	162	240	220	83	96	98	85	116	153	132	101	162	178	96	93	-9	-9	126	117	102	152	90	89	89	85	167	157	124	219	-9	202	163	86	159	111	139
S2_66	71	198	234	92	132	178	172	240	222	85	102	98	87	116	165	132	111	162	178	98	99	-9	-9	140	141	102	154	120	89	95	91	177	157	126	219	-9	204	165	86	159	131	147
S3_1	67	190	100	92	126	174	166	206	222	81	94	96	89	122	151	132	101	162	176	90	91	86	142	128	111	98	148	98	87	89	85	163	153	122	217	161	204	165	82	157	127	153
S3_1	71	192	100	94	130	174	168	238	222	81	96	98	89	134	151	132	103	172	178	96	93	88	142	132	113	98	148	98	89	89	93	179	161	126	219	165	216	169	82	159	129	153
S3_2	67	192	80	92	130	174	166	230	222	81	94	98	89	104	151	132	101	162	178	94	93	86	144	126	135	98	148	98	87	99	85	161	157	124	219	157	200	173	84	157	127	151
S3_2	67	192	80	92	132	176	172	390	222	81	96	98	89	104	153	134	103	166	182	98	95	88	144	132	147	106	154	98	89	99	89	193	157	124	219	169	220	173	84	159	127	153
S3_3	67	192	98	92	130	174	166	208	222	85	94	96	89	128	151	132	101	166	182	92	93	86	136	126	107	98	154	90	85	89	85	179	155	122	219	161	196	165	84	159	125	147
S3_3	67	206	98	94	132	174	168	224	222	85	96	96	99	138	153	132	103	166	182	94	95	88	138	126	107	98	168	96	85	89	91	181	155	124	219	173	198	169	92	159	129	151
S3_4	71	192	96	92	130	174	164	236	222	81	98	100	89	128	153	132	101	156	176	90	91	86	136	126	107	100	150	90	83	89	85	179	155	122	219	161	200	165	84	157	127	147
S3_4	71	192	100	94	130	174	168	242	222	85	98	100	99	160	153	132	103	166	178	90	93	88	138	126	107	102	152	90	87	89	91	229	159	124	219	165	206	169	92	159	127	159
S3_5	67	192	102	92	128	174	164	226	222	85	94	92	99	96	151	132	101	162	176	90	91	86	136	130	107	102	150	90	87	89	91	161	155	124	219	165	200	159	84	159	105	147
S3_5	69	192	102	92	132	174	166	226	222	85	94	96	99	116	151	132	103	162	182	94	95	92	136	130	113	102	150	90	87	89	91	167	159	124	219	175	204	159	92	159	127	151
S3_6	67	192	98	92	130	174	164	224	222	81	94	96	87	124	151	132	101	158	174	94	93	80	132	126	107	98	152	90	89	89	91	191	167	124	217	169	204	167	86	157	127	147
S3_6	67	192	98	94	130	174	164	224	222	85	94	96	99	126	151	134	101	164	176	96	97	86	136	130	111	106	152	96	89	99	91	203	167	128	219	169	204	167	86	159	129	147
S3_7	67	192	98	92	132	174	166	230	222	81	96	96	89	110	153	132	101	158	176	94	95	86	138	114	107	98	150	90	85	89	85	161	153	124	219	169	196	159	92	159	125	147
S3_7	67	192	98	94	136	174	166	394	222	85	98	96	99	126	153	132	101	166	182	96	95	86	138	138	107	100	168	96	89	89	91	181	185	124	219	173	220	169	104	159	129	169
S3_8	67	192	106	92	116	174	164	226	222	85	94	96	85	128	153	132	101	158	176	96	93	86	138	114	107	98	148	90	87	89	85	161	157	124	219	167	196	161	86	161	127	147
S3_8	67	192	108	94	136	174	168	342	222	85	94	96	89	128	153	132	101	162	178	96	93	86	138	118	107	100	150	96	87	89	91	183	157	126	219	169	204	165	86	161	129	149
S3_9	67	192	96	92	132	174	166	228	222	81	96	98	85	102	153	132	101	162	178	90	93	86	138	128	107	98	156	96	87	89	87	161	167	124	217	159	200	159	84	157	129	147
S3_9	67	194	100	92	134	174	168	228	222	87	98	98	89	102	153	132	101	162	178	96	95	92	138	128	111	100	156	96	89	93	89	203	185	124	219	169	220	207	104	159	129	149
S3_10	67	192	98	94	132	174	166	216	222	81	94	96	89	110	151	132	101	164	182	94	93	82	136	126	107	98	154	90	87	89	91	167	163	122	217	159	196	161	92	157	105	149
S3_10	67	192	98	94	132	174	168	394	222	81	96	96	99	124	151	132	103	172	182	94	95	92	138	132	107	106	154	90	87	99	91	175	163	122	219	159	200	183	92	159	129	151
S3_11	67	192	100	92	134	174	164	226	222	85	94	96	99	166	151	132	101	158	182	94	95	82	136	126	107	98	148	90	89	89	87	175	155	124	217	-9	196	159	84	161	127	147
S3_11	67	194	132	94	134	174	164	226	222	85	94	96	123	166	155	132	105	172	182	96	95	86	138	130	107	100	148	100	89	91	87	179	167	124	219	-9	204	165	84	161	129	147
S3_12	71	192	96	92	128	174	168	230	220	81	98	96	89	106	153	132	101	156	176	96	91	86	138	126	107	100	150	90	85	89	85	163	157	122	219	167	200	161	86	161	129	149
S3_12	71	192	122	92	128	174	168	238	222	87	98	96	91	106	153	132	101	166	178	96	91	86	142	168	111	100	154	98	87	89	89	183	163	126	219	169	204	179	86	161	129	151
S3_13	67	192	96	90	128	174	168	222	222	81	94	94	89	106	149	132	101	166	176	94	95	86	142	126	109	98	152	98	85	89	85	159	161	130	217	169	198	161	82	161	127	147
S3_13	71	192	96	92	128	174	168	238	222	85	96	96	89	106	153	132	103	166	182	96	95	92	142	130	109	100	152	98	87	99	89	159	161	130	217	169	204	169	84	161	129	153
S3_14	67	192	102	92	130	174	156	206	222	81	94	98	83	106	151	132	101	158	176	-9	95	86	132	130	135	98	180	96	85	89	89	161	157	124	217	167	202	159	84	157	105	151
S3_14	67	194	102	98	132	174	164	238	222	81	98	98	87	146	151	132	103	162	182	-9	97	104	138	130	141	104	188	96	89	89	91	189	165	126	219	173	202	165	92	157	129	151
S3_15	67	192	96	92	116	174	164	224	222	85	94	98	99	106	153	132	101	162	182	94	93	86	136	126	107	98	148	96	85	89	85	161	157	124	219	167	194	161	124	161	127	151
S3_15	71	192	100	94	132	174	166	236	222	87	94	98	101	110	153	134	101	172	182	96	95	86	142	126	113	98	148	96	87	89	91	183	157	126	219	169	204	165	126	161	129	167
S3_16	67	192	98	92	114	174	164	218	222	81	94	96	87	106	151	132	103	162	176	94	91	82	138	126	107	102	150	90	89	89	89	175	155	124	219	169	204	159	92	161	105	147
S3_16	67	192	98	94	126	176	164	226	222	81	96	96	89	124	153	132	103	162	182	94	95	92	138	130	109	102	154	100	89	91	91	197	159	126	219	169	204	159	92	161	127	151
S3_17	67	192	104	92	126	174	160	228	222	81	94	-9	89	150	149	132	101	162	176	90	93	86	142	128	109	98	150	96	85	89	91	161	155	128	217	167	198	165	82	161	121	151
S3_17	69	192	104	94	130	174	166	387	222	81	94	-9	89	150	151	132	103	164	178	96	95	90	142	132	111	100	150	96	89	91	91	161	165	130	219	169	204	167	84	161	129	167
S3_18	67	194	100	92	130	174	164	228	220	81	94	96	89	118	151	132	101	156	182	94	93	82	138	130	109	98	150	96	87	89	85	179	159	124	219	165	204	161	86	157	127	149
S3_18	71	194	100	92	132	174	168	230	222	85	94	98	89	126	151	132	101	166	182	96	95	86	142	134	137	106	154	96	87	89	91	195	163	124	219	165	204	167	92	157	127	149
S3_19	67	192	100	92	116	174	164	226	222	81	94	100	89	106	149	132	101	162	178	94	93	86	136	112	107	98	148	90	83	89	89	161	155	122	219	161	204	159	86	159	127	147
S3_19	67	192	104	94	130	174	166	226	222	87	98	100	99	140	153	134	101	166	182	96	93	86	142	116	143	98	152	96	85	91	91	175	159	122	219	161	204	161	86	159	129	151
S3_20	67	192	100	92	132	174	164	206	222	85	94	96	89	126	149	132	101	166	176	92	93	80	136	114	107	100	152	90	87	89	89	203	157	124	217	163	202	161	84	159	129	147
S3_20	67	194	100	92	136	174	164	226	222	85	94	98	89	146	151	132	101	166	182	94	93	82	136	116	109	108	152	96	87	89	91	229	167	124	219	169	204	167	86	159	129	147
S3_21	67	192	96	94	130	174	168	222	222	81	94	100	85	110	151	132	101	162	176	94	95	86	138	126	107	98	154	90	87	89	85	175	157	124	219	169	198	161	82	159	127	151
S3_21	71	192	96	94	130	174	172	222	222	85	94	100	85	134	153	134	101	166	182	94	95	88	138	126	107	98	154	98	89	89	89	183	159	128	219	173	204	165	82	159	127	151
S3_22	67	192	98	94	130	174	168	236	222	85	94	96	89	102	147	132	101	156	176	92	91	82	138	128	107	98	154	90	85	89	81	195	159	124	219	159	204	167	84	157	127	147
S3_22	71	192	106	94	134	174	170	394	222	87	94	96	99	108	151	132	103	166	176	94	93	86	138	132	107	98	154	98	87	89	85	231	159	124	219	165	204	169	84	157	127	147
S3_23	67	192	98	90	130	174	166	230	222	81	96	96	89	110	153	132	99	158	176	94	95	86	138	128	107	98	148	96	85	89	85	161	153	122	219	169	196	159	92	159	125	147
S3_23	67	192	98	90	134	174	166	392	222	85	98	96	89	126	153	132	99	166	182	96	95	86	138	132	107	100	150	96	89	89	91	181	185	122	219	173	220	169	104	159	129	169
A1_1	-9	-9	120	92	120	-9	150	-9	-9	85	96	108	81	78	149	-9	81	-9	-9	96	95	86	-9	118	111	102	148	88	83	89	81	165	153	-9	-9	-9	-9	163	86	161	127	157
A1_1	-9	-9	142	92	120	-9	152	-9	-9	85	100	108	85	78	151	-9	93	-9	-9	96	95	88	-9	138	189	104	148	104	83	91	83	165	161	-9	-9	-9	-9	163	88	161	127	157
A1_2	-9	-9	82	92	118	180	152	262	194	81	98	96	85	130	151	-9	81	162	180	90	91	90	-9	126	113	102	152	96	-9	89	85	169	149	-9	-9	-9	202	177	88	157	127	183
A1_2	-9	-9	124	92	118	180	152	262	196	85	98	96	87	130	153	-9	89	162	180	96	93	92	-9	134	113	104	154	104	-9	89	85	169	149	-9	-9	-9	204	187	90	157	127	183
A1_3	-9	-9	88	94	118	180	152	268	192	83	94	98	81	74	149	-9	99	162	176	90	95	90	-9	120	111	102	148	96	83	87	81	165	151	-9	215	-9	202	171	90	157	127	167
A1_3	-9	-9	88	96	120	180	154	272	192	85	96	98	89	152	149	-9	101	162	180	96	95	92	-9	136	125	102	152	100	83	89	87	165	161	-9	215	-9	204	171	90	157	129	213
A1_4	-9	-9	126	92	126	180	150	254	194	85	98	98	83	98	151	134	89	160	176	96	95	86	-9	120	109	102	148	96	83	89	83	165	149	126	215	-9	198	161	88	157	127	167
A1_4	-9	-9	126	94	128	180	152	266	206	85	98	98	83	114	151	136	93	160	178	98	95	88	-9	126	117	102	148	100	83	91	85	171	161	126	215	-9	202	201	88	157	127	167
A1_5	-9	-9	206	94	118	180	150	192	-9	81	92	96	85	74	151	-9	93	158	-9	96	93	86	-9	120	111	102	142	96	-9	89	81	165	153	-9	-9	-9	202	163	86	-9	133	-9
A1_5	-9	-9	226	96	120	180	164	254	-9	85	98	96	85	74	151	-9	101	162	-9	98	95	90	-9	120	111	102	148	98	-9	91	85	169	161	-9	-9	-9	202	163	90	-9	133	-9
A1_6	-9	-9	228	94	118	180	154	254	194	85	94	98	85	106	151	140	93	160	176	90	93	86	-9	130	115	102	148	96	83	89	81	165	149	-9	215	-9	198	163	88	157	127	157
A1_6	-9	-9	230	94	118	180	154	454	194	85	94	98	85	106	151	146	93	162	178	96	93	90	-9	130	137	102	150	96	87	89	85	183	157	-9	215	-9	202	179	88	161	127	163
A1_7	-9	-9	96	94	122	180	152	194	180	85	96	96	83	80	151	134	93	160	176	86	95	88	130	128	111	102	152	98	85	89	83	161	149	124	215	-9	202	167	88	153	127	157
A1_7	-9	-9	96	94	122	180	164	454	194	85	98	96	85	80	153	134	103	162	178	96	95	94	130	134	113	102	172	98	85	89	85	161	159	124	215	-9	202	175	90	159	129	173
A1_8	-9	-9	178	94	118	180	152	270	180	85	92	98	79	74	151	142	81	162	176	94	95	88	130	126	111	102	148	96	85	89	85	165	151	124	217	-9	198	165	88	153	127	173
A1_8	-9	-9	180	96	118	180	156	284	204	85	98	102	83	74	151	142	99	164	178	96	95	90	130	128	113	102	154	96	85	89	107	183	151	128	217	-9	202	171	90	159	127	201
A1_9	-9	-9	214	94	118	180	182	256	202	85	98	96	83	110	151	134	93	160	182	90	93	92	130	130	113	102	148	96	83	89	85	165	149	-9	217	-9	202	167	86	157	127	147
A1_9	-9	-9	216	96	118	180	182	454	202	85	98	96	83	114	151	134	93	162	182	96	95	94	130	130	125	102	148	96	83	89	85	227	149	-9	217	-9	202	167	94	157	127	167
A1_10	-9	-9	200	94	120	180	154	256	180	85	96	98	83	74	151	144	81	160	176	90	93	88	-9	118	109	102	152	98	-9	87	81	165	159	124	215	-9	202	161	88	157	127	147
A1_10	-9	-9	242	102	120	180	154	446	196	85	98	98	87	74	151	144	93	160	178	96	95	90	-9	134	115	102	158	102	-9	91	85	173	159	124	219	-9	202	167	88	157	129	157
A1_11	-9	-9	156	102	118	180	152	256	180	85	94	96	83	100	149	-9	81	160	178	90	95	96	-9	118	111	102	150	94	83	91	81	165	149	-9	215	-9	204	161	88	157	127	161
A1_11	-9	-9	184	104	120	182	154	454	196	85	98	98	83	214	151	-9	93	160	178	96	95	102	-9	136	113	104	200	96	83	95	85	165	149	-9	219	-9	206	185	88	157	127	177
A1_12	-9	-9	176	94	118	180	156	260	180	81	92	96	83	74	147	134	81	160	176	90	93	88	130	120	109	102	148	96	91	91	87	165	149	122	215	-9	198	169	88	157	127	157
A1_12	-9	-9	178	94	120	180	172	458	208	85	102	98	83	74	149	138	81	162	176	90	95	90	130	126	111	102	152	120	91	91	111	187	163	128	215	-9	202	173	88	157	129	169
A1_13	-9	-9	154	94	118	180	154	246	194	81	98	98	83	72	151	134	81	160	176	90	93	86	130	118	103	102	152	96	87	87	83	165	149	124	215	-9	202	161	92	157	111	175
A1_13	-9	-9	208	102	120	180	154	460	208	81	100	98	83	72	151	136	93	160	176	92	95	96	130	132	111	102	176	98	87	97	85	171	155	124	215	-9	204	189	86	157	127	189
A1_14	-9	-9	180	94	120	180	152	256	192	81	94	98	83	-9	151	134	93	162	176	90	93	86	130	120	103	104	152	90	81	89	85	163	149	122	215	-9	198	161	88	159	127	157
A1_14	-9	-9	230	104	120	180	152	446	200	85	98	98	83	-9	151	144	93	162	176	90	95	88	130	132	113	104	174	110	81	89	119	163	157	124	215	-9	202	165	90	159	127	215
A1_15	-9	-9	124	94	120	180	154	260	206	85	94	98	83	96	151	134	81	160	180	90	95	86	130	126	109	102	148	96	-9	89	81	165	149	124	215	-9	202	161	86	161	127	157
A1_15	-9	-9	128	94	120	180	156	260	206	85	94	98	83	172	151	142	81	160	180	90	95	90	140	130	111	102	150	96	-9	91	105	165	161	124	215	-9	202	163	88	161	127	161
A1_16	-9	-9	176	94	118	180	154	228	-9	81	96	96	83	72	147	134	93	160	-9	100	95	90	-9	120	115	102	148	96	81	89	85	-9	149	124	-9	-9	198	-9	88	157	129	139
A1_16	-9	-9	178	94	118	180	154	272	-9	85	98	98	87	74	151	140	93	162	-9	100	95	90	-9	120	139	102	148	106	91	91	89	-9	149	124	-9	-9	198	-9	88	161	129	185
A1_17	-9	-9	130	94	118	180	152	258	180	85	96	96	83	150	151	134	81	158	178	90	93	88	130	132	103	102	148	96	-9	89	87	165	157	124	217	-9	200	161	90	157	121	179
A1_17	-9	-9	132	94	122	180	168	454	210	85	98	98	83	176	151	144	93	160	180	96	95	88	130	132	127	102	152	96	-9	91	115	169	157	124	219	-9	202	161	88	161	127	179
A1_18	-9	-9	102	92	118	180	152	260	180	85	94	96	83	106	149	134	81	160	180	90	95	84	130	128	111	102	148	90	89	89	79	165	149	122	217	-9	204	159	88	157	129	157
A1_18	-9	-9	102	94	120	180	154	280	200	85	98	96	83	140	149	134	81	160	180	94	95	92	130	134	149	102	154	98	89	89	91	167	149	126	217	-9	204	161	90	161	131	157
A1_19	-9	-9	166	94	118	180	152	254	194	85	94	98	83	74	149	-9	81	160	-9	90	95	88	-9	120	111	102	152	96	83	89	81	163	149	122	215	-9	202	159	88	157	129	147
A1_19	-9	-9	166	94	120	180	152	454	194	85	98	98	87	112	149	-9	101	162	-9	96	95	96	-9	120	117	102	154	98	83	89	85	163	149	124	215	-9	202	161	90	157	133	147
A1_20	-9	-9	204	92	120	180	152	276	192	85	94	94	83	74	151	134	93	162	178	-9	93	94	130	132	111	102	148	90	83	89	81	165	153	122	217	-9	202	163	88	157	105	185
A1_20	-9	-9	206	94	124	180	154	454	194	85	98	98	83	78	151	134	93	162	182	-9	95	100	142	136	119	102	148	96	133	89	85	169	159	124	217	-9	202	165	88	159	127	185
A2_1	-9	-9	156	94	120	180	152	194	180	85	94	90	83	74	149	134	93	160	180	90	93	84	130	130	109	102	150	96	-9	89	81	169	161	124	215	-9	198	163	86	157	127	167
A2_1	-9	-9	194	102	120	180	152	196	180	85	94	96	85	128	149	148	99	172	180	90	93	86	144	130	111	102	178	96	-9	89	81	171	161	130	215	-9	202	183	88	157	127	167
A2_2	-9	-9	152	94	118	-9	152	462	-9	81	96	-9	85	76	151	-9	81	-9	-9	96	95	86	-9	130	129	102	148	96	-9	89	85	-9	161	-9	-9	-9	-9	-9	86	157	127	-9
A2_2	-9	-9	228	94	120	-9	154	462	-9	85	98	-9	87	112	151	-9	93	-9	-9	98	105	88	-9	130	131	104	148	98	-9	89	87	-9	163	-9	-9	-9	-9	-9	88	157	129	-9
A2_3	-9	-9	160	94	118	180	152	192	180	85	94	96	83	74	151	134	81	160	178	90	93	86	130	118	113	102	148	94	85	89	85	169	157	128	215	-9	198	163	86	157	127	205
A2_3	-9	-9	226	104	118	180	154	192	192	85	96	96	83	114	151	136	93	162	178	96	93	88	140	130	185	102	150	96	85	89	85	169	157	128	215	-9	202	163	88	157	127	207
A2_4	-9	-9	220	94	120	180	154	172	180	85	96	96	79	74	149	140	81	162	178	90	93	84	142	120	111	102	148	96	83	89	81	173	163	128	217	-9	198	163	86	157	105	165
A2_4	-9	-9	220	104	120	180	154	192	180	85	98	98	83	74	151	148	93	162	180	96	93	86	144	130	187	102	150	96	83	91	85	179	163	128	217	-9	202	163	88	161	127	185
A2_5	-9	-9	152	94	118	180	150	190	180	81	96	96	83	74	149	136	81	162	178	90	93	84	144	120	111	102	150	96	83	89	81	207	163	124	215	-9	198	161	88	157	127	175
A2_5	-9	-9	152	94	120	180	152	360	182	85	98	98	87	128	149	136	93	172	180	96	93	92	144	130	197	102	166	98	83	91	85	207	163	128	215	-9	202	165	92	157	127	215
A2_6	-9	-9	-9	100	120	180	152	250	180	85	94	98	83	74	151	144	81	160	178	90	93	84	130	132	113	102	148	96	83	85	85	163	157	126	215	-9	198	161	86	159	121	171
A2_6	-9	-9	-9	104	120	180	154	340	206	85	106	98	83	118	151	148	93	162	180	94	93	88	142	132	127	104	150	108	83	87	85	171	163	126	215	-9	202	163	90	161	127	179
A2_7	-9	-9	222	94	118	-9	152	192	-9	81	94	98	83	76	151	-9	81	160	178	88	93	-9	-9	130	113	102	148	96	-9	87	85	-9	161	-9	-9	-9	-9	-9	86	157	105	-9
A2_7	-9	-9	222	102	122	-9	152	192	-9	85	108	98	83	116	151	-9	99	160	180	90	93	-9	-9	140	115	102	148	96	-9	89	85	-9	165	-9	-9	-9	-9	-9	90	157	127	-9
A2_8	-9	-9	162	92	118	180	154	272	192	85	98	96	83	140	147	138	93	162	176	90	93	86	130	118	111	102	148	96	81	87	85	167	161	122	215	-9	198	163	88	157	127	157
A2_8	-9	-9	180	104	120	180	154	276	192	85	98	100	83	140	149	148	93	162	180	90	93	86	142	132	125	102	150	98	81	89	85	167	161	126	215	-9	202	163	88	161	127	169
A2_9	-9	-9	160	92	120	180	154	456	180	81	96	96	83	74	151	138	81	162	178	90	93	86	142	118	115	102	148	96	83	89	85	163	163	126	215	-9	202	165	86	157	127	161
A2_9	-9	-9	172	92	120	180	202	456	180	81	96	98	85	126	151	138	93	162	182	90	93	86	142	118	119	102	148	96	83	89	85	171	163	128	219	-9	202	165	90	157	127	241
A2_10	-9	-9	-9	94	118	180	150	238	180	81	94	96	83	74	151	144	93	160	180	96	93	84	142	120	125	102	148	96	83	89	83	169	157	126	215	-9	202	161	86	157	127	165
A2_10	-9	-9	-9	98	120	180	152	242	180	85	98	98	87	74	151	148	93	172	180	96	93	86	144	130	197	104	150	96	83	89	83	189	161	128	215	-9	202	173	88	157	129	219
A2_11	-9	-9	94	94	120	180	154	460	176	85	98	98	85	118	149	134	81	160	176	90	93	84	130	120	111	102	150	94	-9	89	85	167	157	122	215	-9	202	159	88	157	127	165
A2_11	-9	-9	172	94	124	180	154	474	180	85	108	98	85	138	151	140	93	160	180	90	93	86	130	130	111	104	150	96	-9	89	85	171	165	128	215	-9	202	159	90	157	127	179
A2_12	-9	-9	180	92	118	180	154	336	180	85	94	96	81	76	151	140	81	160	176	94	91	84	142	120	115	102	148	96	-9	89	85	169	163	124	215	-9	202	163	90	161	127	177
A2_12	-9	-9	200	92	120	180	154	460	180	85	94	98	85	132	151	140	93	162	180	94	93	84	144	120	199	102	148	96	-9	89	93	203	163	126	219	-9	204	163	90	161	129	207
A2_13	-9	-9	170	92	120	180	154	466	180	85	94	96	85	74	151	134	81	160	176	96	91	84	130	128	113	102	148	96	83	85	81	167	157	126	215	-9	198	165	86	157	127	157
A2_13	-9	-9	184	92	120	180	154	466	214	85	98	98	85	74	151	140	93	172	180	98	93	84	144	128	125	102	148	96	83	89	85	233	163	128	219	-9	202	181	88	157	127	157
A2_14	-9	-9	214	92	118	180	150	192	180	81	94	96	85	74	147	134	81	172	178	90	93	84	142	118	111	102	150	96	-9	87	85	171	163	126	217	-9	202	161	88	157	127	185
A2_14	-9	-9	214	94	120	180	154	196	192	85	98	98	85	226	149	144	93	172	180	90	93	84	144	130	115	104	150	104	-9	87	85	233	163	128	217	-9	202	165	88	157	127	223
A2_15	-9	-9	94	94	118	180	154	460	180	81	94	98	83	74	147	144	93	160	178	96	93	84	142	130	111	102	148	96	83	87	81	171	161	128	215	-9	198	163	86	157	127	169
A2_15	-9	-9	94	104	120	180	154	516	192	85	98	100	83	74	149	144	101	162	180	98	93	96	144	130	125	102	172	98	83	87	85	173	163	128	219	-9	202	165	90	157	127	211
A2_16	-9	-9	206	92	118	180	150	192	208	81	96	98	79	74	147	136	93	160	176	90	93	86	142	130	115	102	150	90	81	87	85	167	157	128	215	-9	198	165	86	157	127	157
A2_16	-9	-9	238	104	120	180	164	192	212	81	96	98	85	126	149	138	93	162	180	90	105	88	144	130	181	102	160	90	81	87	85	167	161	128	215	-9	198	181	90	157	127	157
A2_17	-9	-9	68	92	118	180	154	250	180	85	94	96	85	74	151	134	93	160	178	90	93	88	-9	130	111	102	148	96	-9	89	85	173	163	122	215	-9	202	159	88	157	127	153
A2_17	-9	-9	70	92	120	180	154	338	194	85	98	98	85	112	151	140	101	160	182	90	93	94	-9	130	111	102	148	96	-9	89	85	203	163	130	215	-9	202	165	88	157	129	169
A2_18	-9	-9	70	104	118	180	150	460	180	85	94	98	79	126	149	134	93	160	176	96	95	88	142	120	115	102	148	96	83	89	85	167	163	126	215	-9	202	163	84	157	127	167
A2_18	-9	-9	170	104	118	180	202	460	208	85	98	100	79	148	151	140	93	162	180	98	95	92	144	130	125	102	148	96	83	91	93	213	163	126	215	-9	202	163	86	159	129	173
A2_19	-9	-9	162	94	118	180	154	460	192	85	92	96	83	124	147	148	93	160	178	96	93	84	130	130	113	104	148	96	85	89	83	183	163	124	215	-9	202	161	86	157	127	177
A2_19	-9	-9	162	94	120	180	154	460	206	85	94	98	83	124	151	148	101	162	180	98	93	84	130	130	113	104	164	96	85	89	87	207	163	124	215	-9	202	163	88	161	127	211
A2_20	-9	-9	148	94	120	180	154	456	194	85	94	98	83	74	147	134	93	162	176	94	91	88	130	118	111	102	148	96	-9	87	81	163	155	124	217	-9	198	163	88	157	105	171
A2_20	-9	-9	148	94	120	180	154	456	194	85	98	100	83	120	151	134	93	172	176	94	93	94	130	118	111	102	148	96	-9	87	93	169	155	126	217	-9	202	165	92	157	127	209
A2_21	-9	-9	154	94	118	180	154	194	180	85	94	98	79	74	151	138	93	160	176	90	93	86	130	118	111	102	148	94	83	91	83	167	163	124	215	-9	202	159	88	159	127	171
A2_21	-9	-9	228	102	120	180	156	194	192	85	98	100	83	74	151	140	93	172	178	90	93	92	144	130	129	104	148	94	83	91	85	209	163	126	215	-9	202	161	88	161	127	177
A2_22	-9	-9	82	94	118	180	150	192	192	85	98	100	83	74	151	134	81	160	180	90	91	84	142	130	111	102	150	96	83	89	85	167	163	122	215	-9	202	161	86	159	127	173
A2_22	-9	-9	208	96	120	180	198	192	192	85	98	100	83	74	151	136	101	162	182	90	93	86	144	132	113	102	150	96	83	89	85	169	163	128	215	-9	202	163	90	161	129	173
A2_23	-9	-9	142	94	118	180	150	194	180	81	96	98	79	126	149	136	81	160	178	90	91	84	130	130	111	102	150	98	-9	89	81	169	157	122	217	-9	202	163	86	157	121	155
A2_23	-9	-9	234	94	118	180	152	194	206	85	98	100	81	218	149	138	81	162	180	90	93	86	144	132	115	102	150	98	-9	89	85	171	157	126	217	-9	202	163	92	157	127	155
A2_24	-9	-9	160	94	118	180	152	194	180	81	98	96	83	112	151	140	81	162	178	90	93	84	142	120	113	102	148	96	-9	87	85	171	157	126	215	-9	202	161	86	157	127	161
A2_24	-9	-9	184	94	120	180	152	194	194	85	98	98	83	128	151	142	93	162	180	90	93	84	144	128	125	102	168	96	-9	89	85	171	157	126	215	-9	202	163	94	157	127	211
A2_25	-9	-9	198	96	118	180	154	256	204	85	96	98	83	112	147	148	81	160	176	90	93	84	-9	118	123	102	148	96	-9	89	81	171	163	-9	215	-9	196	163	86	159	129	153
A2_25	-9	-9	244	104	120	180	154	258	210	85	96	100	85	130	149	148	101	162	180	90	93	88	-9	130	125	102	170	96	-9	89	93	237	163	-9	215	-9	196	163	86	161	129	161
A2_26	-9	-9	154	94	120	180	154	194	180	85	94	98	83	118	149	142	93	162	178	90	93	84	142	120	109	102	150	96	83	89	81	169	157	128	215	-9	202	161	90	157	105	153
A2_26	-9	-9	192	102	120	180	154	194	210	85	98	98	85	128	149	144	99	172	180	90	93	94	142	130	113	102	150	96	83	89	83	227	163	128	215	-9	202	163	90	157	127	161
A2_27	-9	-9	150	94	120	180	154	254	180	85	94	96	81	76	151	134	93	160	176	90	93	94	130	118	109	102	148	96	83	85	81	167	163	128	215	-9	198	163	88	157	127	161
A2_27	-9	-9	150	94	120	180	154	258	210	85	98	98	85	76	151	136	101	162	176	90	93	100	144	118	111	102	166	110	83	87	85	167	163	128	215	-9	202	163	88	161	127	181
A2_28	-9	-9	162	94	120	178	152	192	180	85	96	98	79	74	151	134	81	160	178	90	93	84	130	130	111	102	150	96	87	89	81	167	163	126	215	-9	198	163	86	157	123	169
A2_28	-9	-9	208	104	122	180	152	196	214	85	100	100	83	120	151	140	81	160	182	90	93	86	144	130	111	104	150	96	87	89	83	217	163	128	215	-9	202	163	86	161	127	169
A2_29	-9	-9	164	94	120	180	154	468	190	85	98	96	83	74	149	134	81	162	178	96	93	86	142	120	113	102	154	100	-9	91	85	173	157	128	217	-9	198	163	92	157	123	167
A2_29	-9	-9	164	104	120	180	154	468	194	85	100	96	83	126	151	142	81	172	178	98	93	88	144	134	183	102	158	104	-9	91	93	173	157	128	217	-9	202	163	92	159	127	183
A2_30	-9	-9	168	94	118	180	150	194	194	85	90	96	83	74	149	134	81	162	178	90	93	84	130	120	111	102	148	96	83	87	85	167	157	122	215	-9	202	159	86	157	105	171
A2_30	-9	-9	168	94	120	180	152	194	204	85	96	98	85	114	149	136	93	172	180	90	93	94	142	128	115	102	168	96	83	87	85	171	161	126	215	-9	202	159	86	157	127	215
A2_31	-9	-9	114	94	120	180	150	194	180	85	98	98	83	108	151	134	81	160	178	90	93	84	142	120	111	102	148	96	-9	85	81	185	163	128	215	-9	202	161	86	157	105	149
A2_31	-9	-9	240	94	120	180	150	194	182	85	98	100	83	140	151	138	81	162	180	90	93	88	144	128	113	104	148	96	-9	89	85	207	163	128	215	-9	202	163	96	161	127	149
A2_32	-9	-9	70	94	118	180	150	378	194	85	98	96	83	74	147	148	93	160	176	96	93	84	130	128	111	102	148	96	-9	89	85	167	163	126	215	-9	198	163	86	157	111	177
A2_32	-9	-9	76	94	120	180	150	456	210	85	98	96	83	74	151	148	101	162	182	98	93	84	130	130	129	102	168	96	-9	89	93	223	163	126	215	-9	198	167	86	159	127	187
A2_33	-9	-9	160	94	118	180	154	440	180	85	100	96	83	128	151	142	81	160	178	90	93	84	142	128	111	102	168	90	83	89	81	167	157	128	215	-9	202	163	86	159	127	147
A2_33	-9	-9	160	102	124	180	154	458	180	85	110	98	83	128	151	144	93	160	180	94	93	96	142	130	113	102	168	102	83	89	93	185	163	128	215	-9	202	165	86	161	127	157
A2_34	-9	-9	204	94	118	180	152	468	180	85	94	96	83	114	147	134	93	162	180	90	93	86	144	140	113	102	148	96	81	89	81	169	163	122	215	-9	198	163	86	157	127	149
A2_34	-9	-9	204	94	120	180	154	468	192	85	96	100	87	124	149	138	101	172	182	90	105	92	144	140	125	102	148	96	81	89	85	169	163	122	215	-9	202	167	86	157	127	149
A2_35	-9	-9	134	94	120	180	154	444	206	85	94	98	83	76	149	140	81	160	176	96	93	84	130	120	115	102	148	96	-9	87	85	183	157	124	215	-9	202	161	88	157	127	153
A2_35	-9	-9	196	104	120	180	154	444	216	85	96	98	83	140	149	140	93	160	176	98	93	84	130	130	125	102	148	96	-9	87	85	225	157	128	215	-9	202	163	88	159	127	161
A2_36	-9	-9	184	94	118	178	200	256	192	85	92	96	81	74	149	134	71	160	182	90	93	84	130	118	113	102	148	96	83	89	81	165	157	128	215	-9	198	163	88	157	129	167
A2_36	-9	-9	184	94	118	180	208	258	208	85	94	100	83	108	151	140	81	162	182	90	93	88	142	132	115	102	148	96	83	89	85	173	161	128	215	-9	202	165	88	157	129	171
A2_37	-9	-9	186	94	118	172	150	458	180	85	94	96	85	104	151	140	81	162	180	90	91	84	144	118	111	102	148	96	83	89	83	167	163	126	217	-9	202	163	84	157	105	157
A2_37	-9	-9	238	102	120	178	150	458	194	85	94	96	85	148	151	144	93	162	180	90	93	88	144	132	115	102	148	96	83	89	85	167	163	128	217	-9	202	165	88	159	127	157
A2_38	-9	-9	168	94	120	180	150	192	192	81	90	96	79	74	151	132	93	160	174	90	93	86	130	130	115	102	150	90	83	89	81	169	163	126	215	-9	202	165	86	159	105	157
A2_38	-9	-9	192	94	120	180	154	195	214	85	94	98	83	114	151	138	93	160	180	90	93	88	130	132	119	102	174	96	83	89	93	221	163	126	215	-9	204	183	88	161	127	157
A2_39	-9	-9	98	94	118	180	154	458	192	85	94	96	81	72	151	136	81	160	180	90	93	84	142	130	111	102	150	96	83	87	85	167	161	122	215	-9	202	163	88	159	127	183
A2_39	-9	-9	106	94	118	180	202	458	206	85	98	98	85	140	153	136	101	162	182	94	93	88	144	130	125	104	150	96	83	89	87	237	161	128	215	-9	204	163	92	159	127	209
A2_40	-9	-9	178	94	118	180	154	322	180	81	94	98	83	96	147	140	81	160	176	90	93	84	142	120	109	102	148	94	57	85	81	163	161	126	215	-9	202	163	88	159	105	161
A2_40	-9	-9	208	102	120	180	164	458	202	85	94	98	83	118	149	144	93	162	180	90	93	86	144	130	111	102	148	94	59	89	85	171	163	126	215	-9	202	163	92	161	127	161
A2_41	-9	-9	156	94	120	180	154	194	192	85	94	98	81	74	151	140	93	162	180	90	93	86	130	130	111	102	150	96	83	87	81	167	163	124	215	-9	202	159	86	159	127	147
A2_41	-9	-9	156	94	120	180	154	196	206	85	94	98	83	74	151	140	93	172	180	90	93	86	130	134	187	102	150	96	83	89	87	173	163	126	215	-9	202	163	86	159	129	171
A2_42	-9	-9	164	92	118	172	150	190	180	85	94	96	83	74	149	134	93	160	180	90	93	88	130	118	111	102	170	90	81	89	85	165	161	126	215	-9	198	163	88	157	105	167
A2_42	-9	-9	164	98	120	180	152	460	180	85	98	98	83	138	149	148	93	172	182	100	93	94	142	128	113	102	170	96	81	89	85	169	161	128	215	-9	202	167	88	157	123	167
A2_43	-9	-9	88	92	118	180	152	194	192	81	92	96	83	100	147	140	93	162	176	90	95	86	130	128	109	102	148	96	-9	89	85	209	163	124	215	-9	198	167	86	157	129	157
A2_43	-9	-9	216	92	120	180	152	194	212	85	98	98	83	118	149	142	101	162	176	90	95	88	142	128	111	104	148	100	-9	89	85	223	163	130	215	-9	204	169	88	157	129	177
A2_44	-9	-9	190	94	120	178	154	460	206	85	96	96	81	100	149	138	93	162	180	90	93	84	130	126	109	102	148	96	-9	87	83	-9	161	122	-9	-9	202	-9	86	157	105	157
A2_44	-9	-9	214	104	120	180	154	460	210	85	98	96	83	112	149	138	93	172	182	90	93	86	142	132	111	102	150	98	-9	89	85	-9	161	128	-9	-9	202	-9	88	161	127	157
A2_45	-9	-9	86	92	120	-9	150	456	192	81	94	-9	87	76	147	134	81	-9	178	90	93	82	-9	118	111	102	150	96	-9	87	83	169	163	124	215	-9	198	165	88	157	127	171
A2_45	-9	-9	154	92	120	-9	154	456	194	85	98	-9	87	76	149	144	101	-9	180	90	99	86	-9	128	113	102	162	96	-9	89	85	171	163	126	215	-9	202	169	90	157	127	171
A2_46	-9	-9	160	94	118	180	154	460	180	81	94	98	79	74	151	140	93	160	178	90	93	86	130	118	111	102	148	96	83	89	81	167	163	124	217	-9	198	161	88	157	105	167
A2_46	-9	-9	202	104	118	180	202	460	192	81	98	98	85	74	151	148	93	172	180	90	93	86	144	136	131	102	148	96	83	89	85	173	163	128	217	-9	202	163	88	157	127	171
A2_47	-9	-9	170	92	120	180	152	458	180	85	94	98	83	76	149	144	81	162	176	96	93	84	142	128	113	102	148	96	83	87	85	171	163	124	215	-9	202	163	86	157	127	161
A2_47	-9	-9	170	92	120	180	152	458	194	85	98	98	83	76	149	146	93	162	180	98	97	84	144	134	185	102	150	96	83	89	93	173	163	126	215	-9	202	177	90	157	127	161
A2_48	-9	-9	130	92	120	180	152	460	192	85	94	98	83	114	147	148	81	168	176	94	95	86	130	118	111	102	148	96	-9	89	81	167	157	122	215	-9	198	161	84	157	127	157
A2_48	-9	-9	130	92	120	180	154	460	194	85	100	100	83	120	149	148	81	172	180	94	105	96	144	128	115	102	150	96	-9	91	85	167	157	122	215	-9	202	165	86	157	127	165
A2_49	-9	-9	164	92	120	180	154	194	180	81	94	96	81	76	149	140	93	160	178	90	93	84	130	130	109	102	148	100	83	89	85	169	161	124	215	-9	202	163	88	157	127	157
A2_49	-9	-9	190	92	120	180	154	194	194	85	98	98	83	114	149	140	93	172	180	90	93	86	144	140	111	104	162	100	85	89	93	209	161	126	215	-9	204	183	88	157	127	187
A2_50	-9	-9	134	94	118	180	152	194	198	85	94	96	79	74	147	132	93	160	176	90	95	86	130	130	111	102	152	96	-9	87	85	167	155	128	215	-9	198	161	86	157	105	153
A2_50	-9	-9	186	102	118	180	154	194	212	85	98	98	83	74	147	142	93	160	180	90	95	86	130	130	115	102	152	100	-9	89	87	167	155	128	215	-9	202	163	92	157	127	167
A2_51	-9	-9	220	96	118	180	150	466	192	81	98	98	83	116	147	134	93	160	176	94	95	84	130	132	115	102	148	96	-9	89	81	167	163	122	215	-9	202	161	86	157	117	173
A2_51	-9	-9	220	104	118	180	150	466	194	85	98	98	85	128	149	142	93	162	180	94	95	86	130	132	121	102	148	96	-9	89	85	169	163	128	215	-9	204	163	94	157	127	213
A2_52	-9	-9	156	92	118	180	154	256	194	85	96	98	81	74	149	138	81	160	174	96	95	86	142	120	111	102	148	96	83	89	93	167	161	124	215	-9	198	161	86	157	127	171
A2_52	-9	-9	156	104	118	180	154	256	206	85	98	98	83	128	149	140	93	160	176	98	95	90	144	132	115	102	148	112	95	91	93	167	161	128	215	-9	202	165	94	157	127	171
A2_53	-9	-9	212	94	118	180	152	446	180	81	94	96	83	74	149	138	93	160	176	90	95	84	130	120	111	102	148	96	83	89	85	167	163	124	217	-9	202	161	88	157	127	165
A2_53	-9	-9	212	100	122	180	154	458	202	85	96	100	89	76	149	142	93	160	180	90	95	96	142	130	183	102	150	112	83	89	85	173	163	128	217	-9	204	163	88	157	127	177
A2_54	-9	-9	150	92	120	180	154	452	180	85	94	98	79	116	149	134	81	160	180	90	95	88	130	130	109	102	148	96	83	89	81	167	157	128	215	-9	202	171	86	157	127	165
A2_54	-9	-9	162	92	120	180	154	460	192	85	94	98	83	116	149	148	93	172	182	90	95	96	142	130	113	104	174	96	83	89	85	199	161	128	215	-9	204	173	86	161	127	197
A2_55	-9	-9	172	92	118	180	154	446	206	85	98	96	81	74	149	134	81	160	180	90	95	84	130	132	111	102	148	96	83	89	81	169	163	122	215	-9	198	159	86	157	127	163
A2_55	-9	-9	172	92	118	180	154	460	214	85	108	96	89	74	149	138	93	162	180	90	95	92	142	132	115	102	148	96	83	89	85	169	163	126	215	-9	198	163	92	157	127	171
A2_56	-9	-9	136	92	120	-9	152	476	-9	81	94	-9	83	74	149	-9	81	-9	-9	-9	93	-9	-9	130	111	102	148	96	-9	89	83	-9	191	-9	-9	-9	-9	169	88	157	129	-9
A2_56	-9	-9	136	94	120	-9	152	476	-9	85	98	-9	85	78	149	-9	93	-9	-9	-9	93	-9	-9	136	111	102	148	98	-9	89	85	-9	191	-9	-9	-9	-9	169	88	161	129	-9
A2_57	-9	-9	166	92	120	178	152	458	180	85	94	98	83	112	149	136	81	160	180	96	95	84	130	130	111	102	148	96	83	89	85	167	163	122	215	-9	202	161	86	157	127	175
A2_57	-9	-9	166	92	120	180	152	472	194	85	94	98	83	128	149	138	101	172	180	98	95	86	144	136	113	102	148	96	83	89	85	167	163	124	215	-9	202	163	88	157	127	175
A2_58	-9	-9	212	92	118	180	152	258	206	85	98	96	83	112	151	134	81	160	176	96	95	84	130	120	109	102	148	96	-9	87	85	167	161	122	215	-9	202	161	88	157	127	169
A2_58	-9	-9	212	94	120	180	152	448	206	85	98	96	83	112	151	144	93	162	180	98	105	88	144	130	111	102	150	96	-9	89	85	169	161	128	215	-9	204	163	88	161	127	175
A2_59	-9	-9	128	94	118	180	152	460	180	81	94	96	81	74	147	138	81	162	180	90	93	84	-9	120	113	102	148	96	83	89	83	163	161	126	215	-9	198	159	88	157	105	163
A2_59	-9	-9	160	94	120	180	152	460	180	81	94	98	81	74	149	140	81	164	180	90	93	86	-9	136	115	104	148	96	83	89	85	169	161	128	219	-9	202	163	88	157	127	179
A2_60	-9	-9	-9	92	118	180	152	192	192	85	96	98	83	116	151	132	81	162	180	96	93	84	142	138	111	102	148	96	-9	87	81	167	157	122	215	-9	202	163	90	157	127	157
A2_60	-9	-9	-9	104	120	180	152	196	194	85	98	98	83	130	151	132	81	172	182	100	93	86	142	142	111	104	172	98	-9	89	93	171	157	128	215	-9	202	171	92	157	127	157
A2_61	-9	-9	186	102	118	180	154	194	180	85	98	98	79	112	147	134	81	162	176	90	95	84	142	130	109	102	148	96	85	89	81	167	163	122	217	-9	202	163	88	157	127	157
A2_61	-9	-9	186	106	118	180	154	196	206	85	98	98	83	124	149	134	93	172	180	90	95	96	144	130	111	102	148	96	85	89	85	167	163	122	217	-9	202	163	88	161	129	157
R_1	-9	202	68	88	120	176	150	326	184	83	82	96	85	74	157	130	95	178	176	92	95	90	136	122	105	96	144	96	85	77	85	163	-9	-9	-9	-9	-9	159	88	157	131	143
R_1	-9	204	70	88	128	176	156	346	184	83	82	100	85	74	157	130	97	190	178	98	95	90	136	122	105	96	144	106	85	85	87	165	-9	-9	-9	-9	-9	159	88	159	133	149
R_2	-9	200	68	88	126	176	150	236	188	83	82	98	83	74	153	126	91	186	178	92	95	90	136	122	105	98	144	90	85	87	85	163	-9	-9	-9	-9	-9	159	84	157	131	149
R_2	-9	202	68	88	126	176	150	338	192	83	98	100	83	76	153	126	97	190	178	98	95	90	142	122	105	98	144	104	85	89	85	165	-9	-9	-9	-9	-9	159	88	163	133	159
R_3	-9	200	66	88	124	168	150	278	186	83	82	98	85	74	153	126	93	176	178	100	95	90	136	122	105	96	144	94	85	85	85	165	-9	-9	-9	-9	206	155	88	159	131	149
R_3	-9	204	68	88	124	176	156	328	186	83	82	98	85	74	153	126	97	182	178	102	95	96	136	122	105	96	144	104	85	85	85	165	-9	-9	-9	-9	206	159	88	161	133	159
R_4	-9	202	70	88	124	176	150	298	182	83	82	96	83	74	157	128	95	180	176	92	93	90	136	122	105	96	144	104	85	77	85	161	-9	-9	-9	-9	-9	159	88	161	131	149
R_4	-9	202	70	88	124	176	156	368	184	83	82	100	83	74	157	128	97	186	176	94	95	94	142	122	105	96	144	108	85	85	87	171	-9	-9	-9	-9	-9	159	88	161	131	149
R_5	-9	202	70	86	118	176	150	278	184	83	90	98	79	74	153	128	93	178	178	104	93	90	136	122	105	96	144	94	85	77	85	161	-9	-9	-9	-9	-9	153	84	161	131	149
R_5	-9	202	76	86	118	176	156	336	186	83	96	100	85	74	157	128	101	184	178	104	95	90	142	122	105	96	144	94	85	85	85	165	-9	-9	-9	-9	-9	159	88	161	131	149
R_6	-9	202	68	86	120	168	150	308	182	83	90	96	85	74	153	130	93	186	178	98	95	90	136	122	105	98	144	94	85	77	85	165	-9	-9	-9	-9	-9	159	88	157	131	149
R_6	-9	202	86	86	122	176	156	344	184	85	94	96	87	74	153	130	97	190	178	98	95	96	136	122	105	98	144	106	85	89	85	165	-9	-9	-9	-9	-9	159	88	161	131	159
R_7	-9	202	70	86	118	176	150	284	196	83	90	98	83	74	153	-9	91	178	176	92	95	94	136	122	105	96	144	92	85	77	85	167	-9	-9	-9	-9	-9	159	88	157	131	149
R_7	-9	204	76	86	120	176	156	350	196	85	94	98	83	74	155	-9	99	188	178	100	95	94	136	122	105	96	144	92	87	89	87	167	-9	-9	-9	-9	-9	159	88	159	131	149
R_8	-9	194	66	88	120	176	150	302	182	83	90	96	83	74	153	-9	93	186	178	100	95	94	136	122	105	96	144	94	85	85	85	177	-9	-9	-9	-9	-9	155	88	157	131	149
R_8	-9	202	66	88	128	176	156	330	184	83	94	98	83	74	155	-9	95	196	178	100	95	96	138	122	105	96	144	104	85	85	87	177	-9	-9	-9	-9	-9	159	88	161	133	149
R_9	-9	196	66	88	120	168	150	342	184	85	94	98	83	74	153	128	93	176	178	92	93	90	136	122	105	96	144	94	85	85	85	163	-9	-9	-9	-9	-9	159	88	149	131	149
R_9	-9	202	68	88	120	176	156	398	186	85	98	98	83	74	153	128	97	182	180	98	95	94	136	122	105	96	144	94	85	85	85	165	-9	-9	-9	-9	-9	159	88	157	133	149
R_10	-9	194	66	86	120	176	152	316	-9	83	94	96	83	74	157	-9	97	180	-9	92	93	94	136	122	105	98	144	94	85	77	85	165	-9	-9	-9	-9	-9	155	84	157	131	149
R_10	-9	202	74	88	128	176	158	344	-9	83	98	100	83	74	161	-9	99	180	-9	102	95	94	136	124	105	100	144	104	85	77	87	165	-9	-9	-9	-9	-9	159	84	157	131	149
R_11	-9	200	66	86	120	176	150	228	192	83	90	98	83	74	157	126	95	188	176	92	93	90	136	122	105	96	144	94	85	77	85	163	-9	-9	-9	-9	-9	155	88	161	131	149
R_11	-9	204	78	88	120	176	156	248	192	85	94	100	83	74	159	126	99	190	178	92	95	94	142	122	105	96	144	106	85	77	87	165	-9	-9	-9	-9	-9	155	88	163	131	149
R_12	-9	198	70	86	120	168	150	296	192	83	90	98	83	74	153	-9	91	184	176	100	93	90	136	122	105	96	144	94	85	77	87	179	-9	-9	-9	-9	-9	159	84	157	133	147
R_12	-9	200	74	88	128	178	156	348	192	83	94	100	83	74	153	-9	99	184	176	100	95	94	136	122	105	96	144	104	85	77	87	179	-9	-9	-9	-9	-9	159	84	161	133	149
R_13	-9	196	68	86	118	176	150	300	194	83	90	98	83	74	155	128	95	186	176	98	93	90	142	122	105	98	144	90	85	77	85	163	-9	-9	-9	-9	242	153	88	157	131	149
R_13	-9	202	70	88	118	186	156	362	194	83	94	98	83	74	163	128	97	186	178	102	93	94	142	122	105	98	144	94	85	87	85	163	-9	-9	-9	-9	242	159	88	157	135	159
R_14	-9	202	68	86	122	176	150	338	-9	83	90	98	83	74	153	130	93	184	178	98	93	90	136	122	105	96	144	92	85	77	85	169	-9	-9	-9	-9	-9	159	88	143	133	149
R_14	-9	204	68	88	122	176	156	368	-9	83	94	100	87	74	161	130	97	194	178	98	93	90	144	122	105	98	144	108	85	77	87	169	-9	-9	-9	-9	-9	159	88	161	135	149
R_15	-9	198	68	86	120	168	150	306	184	83	90	96	83	74	153	124	99	188	176	92	93	90	136	122	105	98	144	94	85	87	85	167	-9	-9	-9	-9	214	159	88	161	131	149
R_15	-9	202	74	88	120	176	156	348	184	83	94	100	85	74	153	130	109	188	178	100	95	90	136	122	105	98	144	98	85	87	87	167	-9	-9	-9	-9	252	159	88	161	133	149
R_16	-9	202	68	86	118	176	150	298	194	83	82	98	83	74	159	130	97	192	-9	98	93	94	136	124	105	96	144	92	85	85	85	165	-9	-9	-9	-9	-9	153	88	161	131	149
R_16	-9	202	74	88	118	178	156	328	194	85	90	100	83	74	159	130	101	196	-9	100	95	94	138	124	105	96	144	92	85	89	85	169	-9	-9	-9	-9	-9	155	88	161	133	149
R_17	-9	198	68	86	120	176	152	340	192	83	82	96	83	74	157	134	95	182	176	94	95	76	136	122	105	96	144	94	85	85	85	165	-9	-9	-9	-9	212	153	84	161	131	149
R_17	-9	202	68	88	126	176	158	380	192	83	82	100	83	74	157	134	95	188	178	100	95	94	136	124	105	96	144	94	85	89	85	167	-9	-9	-9	-9	212	157	88	161	131	149
R_18	-9	202	68	86	120	176	150	330	192	83	82	98	83	74	153	-9	91	186	176	96	93	90	136	122	105	96	144	96	85	77	85	-9	-9	-9	-9	-9	-9	-9	84	157	131	149
R_18	-9	204	74	88	128	176	154	350	192	83	96	98	83	74	157	-9	93	186	176	96	95	94	144	122	105	96	144	104	85	87	85	-9	-9	-9	-9	-9	-9	-9	88	161	133	149
R_19	-9	196	66	88	120	156	150	302	184	83	82	96	83	74	153	130	97	182	178	98	93	76	136	122	105	96	144	94	85	77	85	165	-9	-9	-9	-9	-9	155	88	157	131	149
R_19	-9	206	66	88	120	176	158	344	184	85	82	100	83	74	153	130	97	196	178	100	95	98	144	122	105	98	144	94	85	77	87	171	-9	-9	-9	-9	-9	161	88	161	133	149
R_20	-9	202	66	86	120	176	150	314	192	83	90	96	79	74	153	126	93	182	178	98	93	92	136	122	105	96	144	94	85	77	85	165	-9	-9	-9	-9	226	153	88	161	131	149
R_20	-9	204	66	88	120	182	154	356	192	85	96	98	83	74	157	126	97	192	178	102	95	94	136	126	105	96	144	96	85	85	85	207	-9	-9	-9	-9	226	159	88	161	133	149
R_21	-9	198	68	86	124	176	150	216	178	83	82	96	79	74	153	128	93	184	174	102	93	88	136	122	105	96	144	90	85	85	85	165	-9	-9	-9	-9	-9	159	88	161	131	145
R_21	-9	198	74	88	124	176	156	344	184	83	90	100	85	74	157	128	97	184	176	102	93	90	138	124	105	96	144	94	87	89	85	167	-9	-9	-9	-9	-9	161	88	161	131	149
R_22	-9	192	68	86	120	176	150	302	182	83	82	100	83	74	153	128	91	188	176	98	93	90	136	122	105	96	144	94	85	77	85	163	-9	-9	-9	-9	236	159	88	157	131	149
R_22	-9	192	68	88	128	176	156	302	184	83	90	102	83	74	155	128	93	192	178	100	95	90	142	122	107	96	144	96	85	77	87	165	-9	-9	-9	-9	238	159	88	161	131	149
R_23	-9	192	66	88	120	168	150	320	180	83	84	98	83	74	153	-9	91	178	178	100	93	94	136	122	105	96	144	94	85	77	85	169	-9	-9	-9	-9	-9	159	88	161	131	149
R_23	-9	202	70	88	120	168	156	380	180	83	84	100	83	74	153	-9	97	188	178	102	95	94	136	124	105	98	144	96	85	85	85	169	-9	-9	-9	-9	-9	159	88	163	131	149
R_24	-9	202	68	88	120	168	150	324	184	83	84	96	83	72	153	130	95	186	178	92	95	90	136	122	105	98	144	104	85	85	85	165	-9	-9	-9	-9	-9	159	88	159	131	149
R_24	-9	202	68	88	120	168	156	366	194	83	96	100	83	74	157	130	99	186	178	92	95	94	136	122	105	98	144	104	85	89	85	165	-9	-9	-9	-9	-9	161	88	161	135	149
R_25	-9	194	68	88	120	176	150	278	196	83	84	100	83	74	157	128	91	178	178	98	93	90	136	122	105	96	144	94	85	77	85	165	-9	-9	-9	-9	-9	153	88	157	131	149
R_25	-9	202	70	88	120	176	156	344	196	83	84	100	85	74	157	132	95	198	178	98	95	94	136	122	105	96	144	108	85	77	85	211	-9	-9	-9	-9	-9	159	88	161	131	149
R_26	-9	202	66	88	128	168	150	328	184	83	96	96	83	74	155	128	95	178	178	98	93	90	136	122	105	96	144	98	85	77	85	167	-9	-9	-9	-9	-9	159	88	161	131	149
R_26	-9	204	68	88	128	168	156	342	186	85	96	100	85	74	157	128	95	186	178	100	95	90	142	124	105	98	144	104	85	89	87	167	-9	-9	-9	-9	-9	159	88	161	133	149
R_27	-9	198	68	88	126	168	150	276	-9	83	82	96	83	74	157	130	91	174	178	96	93	90	142	122	105	98	144	96	85	85	85	165	-9	-9	-9	-9	-9	159	84	157	131	143
R_27	-9	202	70	88	126	168	156	336	-9	83	84	98	83	74	161	130	111	184	178	100	95	90	144	124	105	98	144	104	87	85	85	167	-9	-9	-9	-9	-9	159	88	161	133	149
R_28	-9	202	76	72	120	176	152	396	192	83	82	96	83	74	153	-9	93	190	176	102	93	90	142	122	105	96	144	94	85	85	85	167	-9	-9	-9	-9	-9	155	84	161	131	149
R_28	-9	204	76	86	120	176	160	396	192	83	82	98	83	74	157	-9	99	190	178	102	95	94	148	122	105	98	144	94	85	89	87	167	-9	-9	-9	-9	-9	159	88	161	131	159
R_29	-9	192	68	88	120	176	150	298	184	83	84	98	83	74	153	-9	91	180	176	98	95	90	136	122	105	96	144	96	85	77	85	165	-9	-9	-9	-9	-9	159	84	157	131	149
R_29	-9	198	70	88	128	176	156	382	184	83	84	100	83	74	153	-9	93	180	178	100	95	90	136	122	105	96	144	104	85	87	87	165	-9	-9	-9	-9	-9	159	84	161	133	149
R_30	-9	202	68	88	120	168	152	350	-9	83	82	102	85	74	153	128	93	176	178	100	95	90	136	122	105	96	144	104	85	77	85	163	-9	-9	-9	-9	262	157	84	161	131	149
R_30	-9	202	70	88	126	168	158	366	-9	83	82	102	85	74	153	128	95	196	178	102	95	90	136	122	107	98	144	108	85	87	85	165	-9	-9	-9	-9	264	159	88	161	131	149
R_31	-9	202	68	88	120	174	150	330	196	83	82	98	87	74	157	130	97	188	178	92	93	88	136	122	105	96	144	94	85	77	85	165	-9	-9	-9	-9	-9	155	88	157	131	149
R_31	-9	202	70	88	128	176	156	368	196	85	82	100	87	74	165	132	97	188	180	98	93	90	136	122	105	96	144	96	85	77	85	165	-9	-9	-9	-9	-9	159	88	161	133	159
R_32	-9	200	70	88	120	174	150	340	180	83	82	96	85	74	153	128	95	176	180	102	95	90	136	122	105	96	144	92	85	85	85	163	-9	-9	-9	-9	222	153	88	157	131	149
R_32	-9	202	70	88	120	176	150	390	184	83	82	98	85	74	159	128	97	176	182	102	95	94	142	124	105	96	144	94	85	89	85	167	-9	-9	-9	-9	222	159	88	159	131	149
R_33	-9	202	66	88	120	174	150	278	196	83	82	98	83	74	157	126	91	176	178	92	95	90	136	122	105	96	144	96	85	85	85	-9	-9	-9	-9	-9	-9	-9	88	161	131	149
R_33	-9	208	72	88	124	176	150	352	196	83	98	100	85	74	163	126	97	186	178	102	95	96	142	122	105	96	144	104	85	85	87	-9	-9	-9	-9	-9	-9	-9	88	161	133	149
R_34	-9	202	68	88	122	174	150	278	184	83	82	96	85	74	153	132	95	176	174	92	95	90	136	122	105	96	144	92	85	85	85	165	-9	-9	-9	-9	-9	155	88	157	131	149
R_34	-9	202	80	88	126	176	156	330	186	83	96	98	87	74	153	132	101	178	178	98	95	90	144	122	105	96	144	96	85	89	87	165	-9	-9	-9	-9	-9	161	88	157	131	149
L_1	-9	-9	72	110	124	172	150	354	180	85	90	90	83	68	151	128	105	172	184	96	95	86	-9	124	105	84	150	84	87	91	153	163	-9	-9	219	137	194	163	86	161	119	199
L_1	-9	-9	88	110	124	172	150	354	180	103	96	90	83	68	157	134	105	172	186	100	95	94	-9	124	105	84	152	84	91	91	153	163	-9	-9	219	137	194	167	88	161	119	227
L_2	-9	-9	80	110	124	172	150	400	182	89	88	96	83	68	151	124	99	172	180	96	93	86	-9	122	105	84	150	86	87	91	153	163	-9	-9	219	137	194	163	86	161	119	227
L_2	-9	-9	80	110	124	172	150	486	182	115	88	96	83	68	151	128	99	172	180	100	93	94	-9	122	107	100	154	90	87	91	153	163	-9	-9	219	137	194	163	86	161	119	227
L_3	-9	-9	84	110	124	172	150	398	178	89	88	96	83	68	151	124	105	172	186	96	97	88	-9	124	105	84	156	86	87	91	153	163	-9	-9	219	137	194	163	88	161	119	233
L_3	-9	-9	84	110	124	172	150	444	180	91	88	96	83	68	157	126	109	172	186	98	97	90	-9	124	105	84	156	92	87	91	153	163	-9	-9	219	137	194	165	88	161	119	233
L_4	-9	-9	80	110	116	172	150	486	182	123	88	82	83	68	151	120	99	172	180	96	101	96	-9	122	105	-9	156	88	87	87	153	163	-9	-9	219	-9	194	165	86	161	119	191
L_4	-9	-9	84	110	124	172	150	486	184	123	88	96	83	68	157	126	103	172	180	98	103	98	-9	122	105	-9	156	94	93	91	153	163	-9	-9	219	-9	194	167	86	161	121	191
L_5	-9	-9	82	110	116	172	150	380	178	89	88	96	83	68	153	124	101	172	-9	96	99	86	-9	126	105	100	150	84	87	91	153	163	-9	-9	219	137	194	163	88	161	119	209
L_5	-9	-9	82	110	116	172	150	398	180	91	88	96	83	68	155	130	103	172	-9	100	103	86	-9	126	105	102	158	92	87	91	153	163	-9	-9	219	137	194	165	88	161	119	209
L_6	-9	-9	84	110	122	172	150	404	180	93	88	96	83	68	149	124	101	172	180	96	95	88	-9	124	105	84	154	84	87	91	153	163	-9	-9	219	137	194	161	86	161	119	199
L_6	-9	-9	84	110	124	172	150	404	182	135	88	96	83	68	157	128	101	172	186	98	103	90	-9	124	105	84	156	84	89	91	153	163	-9	-9	219	137	194	163	88	161	119	221
L_7	-9	-9	82	110	122	172	150	372	180	119	88	96	83	62	149	124	103	170	180	96	99	88	-9	124	105	84	152	84	85	91	153	163	-9	-9	219	137	194	163	86	161	119	205
L_7	-9	-9	84	110	124	172	150	492	186	141	88	96	83	68	157	128	103	170	180	98	107	90	-9	124	105	84	160	92	91	91	153	163	-9	-9	219	137	194	167	86	161	119	215
L_8	-9	-9	86	110	126	172	150	434	182	91	88	96	83	62	155	124	99	170	182	96	97	88	-9	124	105	84	158	86	87	89	153	163	-9	-9	219	137	194	169	84	161	119	227
L_8	-9	-9	88	110	126	172	150	476	182	91	88	96	83	68	157	126	99	172	186	98	99	90	-9	124	105	100	164	96	91	91	153	163	-9	-9	219	137	194	171	86	161	119	227
L_9	-9	-9	-9	110	122	172	150	366	182	89	88	96	83	68	155	126	105	172	174	96	97	92	138	124	105	84	152	84	85	91	153	163	-9	-9	219	137	194	163	88	161	119	213
L_9	-9	-9	-9	110	124	172	150	392	182	99	88	96	83	68	157	126	107	172	182	98	97	92	146	124	105	100	156	88	89	91	153	163	-9	-9	219	137	194	169	88	161	119	213
L_10	-9	-9	84	110	122	172	150	418	182	95	88	96	83	68	149	124	99	172	180	98	97	90	138	124	105	84	170	86	87	89	153	163	-9	-9	219	137	194	165	82	161	119	259
L_10	-9	-9	84	110	124	172	164	418	182	125	88	96	83	68	155	126	103	172	182	100	101	96	142	124	105	84	174	88	87	91	153	163	-9	-9	219	137	194	167	84	161	119	277
L_11	-9	-9	84	108	122	172	152	406	182	93	88	96	83	62	149	120	101	172	178	96	103	86	-9	122	105	84	160	82	89	87	153	-9	-9	-9	-9	137	194	-9	86	161	119	213
L_11	-9	-9	84	110	126	172	152	440	182	101	88	96	83	64	151	128	101	172	182	98	105	90	-9	122	105	102	162	84	95	91	153	-9	-9	-9	-9	137	194	-9	88	161	119	213
L_12	-9	-9	80	110	116	172	150	288	182	89	88	96	83	68	157	120	101	172	180	96	103	92	140	124	105	84	156	86	85	87	153	163	-9	-9	219	-9	194	163	88	161	119	213
L_12	-9	-9	80	110	124	172	150	288	182	123	88	96	83	68	157	126	103	172	182	98	105	92	140	124	105	84	156	88	91	91	153	163	-9	-9	219	-9	194	163	88	161	119	247
L_13	-9	-9	82	108	122	172	150	414	182	93	88	94	83	62	149	124	103	170	180	98	97	90	138	124	103	84	144	84	87	89	153	163	-9	-9	219	137	194	167	84	159	119	203
L_13	-9	-9	84	110	124	172	158	414	184	103	88	94	83	68	157	130	109	172	180	100	101	96	150	124	105	84	156	84	87	89	153	163	-9	-9	219	137	194	169	88	161	119	203
L_14	-9	-9	82	108	122	172	150	404	182	91	88	96	83	68	151	124	105	172	180	98	101	92	138	124	105	100	156	88	87	89	153	163	-9	-9	219	137	194	161	86	161	119	229
L_14	-9	-9	82	110	124	172	160	434	182	95	88	96	83	68	155	130	105	172	184	100	105	96	138	124	105	100	156	92	91	91	153	163	-9	-9	219	137	194	163	86	161	119	229
L_15	-9	-9	84	108	124	172	150	418	182	91	88	94	83	68	155	124	99	172	182	96	97	88	138	126	105	84	156	84	87	91	153	163	-9	-9	219	137	194	163	86	159	119	257
L_15	-9	-9	84	110	124	172	158	466	186	95	88	94	83	68	157	124	99	172	184	100	97	92	138	126	105	84	158	94	89	91	153	163	-9	-9	219	137	194	171	88	161	119	257
L_16	-9	-9	84	108	122	172	150	386	182	89	88	96	83	68	151	128	99	170	176	96	101	86	138	124	105	84	152	84	87	87	153	163	-9	-9	219	137	194	163	86	159	119	233
L_16	-9	-9	84	110	124	172	158	484	182	95	88	96	83	68	155	132	99	172	180	96	103	92	146	124	105	100	174	94	87	91	153	163	-9	-9	219	137	194	167	86	161	119	273
L_17	-9	-9	80	108	116	172	150	386	182	109	88	96	83	68	153	124	99	172	178	96	97	90	138	124	105	84	156	84	87	91	153	163	-9	-9	219	137	194	171	88	161	119	183
L_17	-9	-9	82	110	124	172	162	454	182	133	88	96	83	68	157	128	99	172	182	98	97	94	138	124	105	100	170	94	87	93	153	163	-9	-9	219	137	194	173	88	161	119	211
L_18	-9	-9	84	108	124	172	150	390	182	109	88	96	83	68	153	124	99	172	178	96	101	90	138	124	105	84	154	84	87	91	153	163	-9	-9	219	137	194	163	84	159	119	213
L_18	-9	-9	84	110	124	172	160	390	182	113	88	96	83	68	157	130	101	172	182	98	103	92	138	124	105	84	168	94	89	91	153	163	-9	-9	219	137	194	169	84	161	119	219
L_19	-9	-9	82	110	124	172	150	374	182	91	88	-9	83	68	153	124	97	172	182	96	95	-9	138	122	105	84	158	90	85	89	153	163	-9	-9	219	137	194	165	86	161	119	217
L_19	-9	-9	84	110	124	172	150	406	184	93	88	-9	83	68	157	128	103	172	184	100	95	-9	144	126	105	100	172	98	89	91	153	163	-9	-9	219	137	194	169	88	161	119	217
L_20	-9	-9	84	110	124	172	150	310	182	101	88	-9	83	68	149	128	99	-9	180	96	97	-9	138	124	105	84	156	86	91	91	153	163	-9	-9	219	137	-9	163	86	161	119	-9
L_20	-9	-9	84	110	124	172	158	404	184	123	88	-9	83	68	157	134	99	-9	184	98	101	-9	138	124	105	84	156	96	91	91	153	163	-9	-9	219	137	-9	165	86	161	119	-9
L_21	-9	-9	82	110	122	170	150	404	182	93	88	88	83	68	155	124	105	172	178	96	93	88	140	124	105	84	150	96	91	91	153	163	-9	-9	219	137	194	167	86	161	119	209
L_21	-9	-9	82	110	124	170	160	452	182	97	88	88	83	68	155	124	105	172	178	100	93	90	150	124	105	100	156	96	91	91	153	163	-9	-9	219	137	194	169	86	161	119	213
L_22	-9	-9	82	110	124	172	150	382	182	89	88	96	83	68	155	124	99	172	182	96	101	88	138	124	105	84	148	90	87	89	153	163	-9	-9	219	137	194	161	86	161	119	207
L_22	-9	-9	82	110	124	172	160	412	182	89	88	96	83	68	157	128	103	172	182	96	105	92	156	124	105	98	156	96	91	89	153	163	-9	-9	219	137	194	167	88	161	119	213
L_23	-9	-9	80	110	124	172	150	384	182	95	88	96	83	68	151	126	99	172	178	96	101	88	138	122	105	84	154	86	91	91	153	163	-9	-9	219	137	194	161	88	161	119	215
L_23	-9	-9	82	110	124	172	160	384	184	97	88	96	83	70	155	126	99	172	182	96	105	90	138	126	107	100	164	86	91	91	153	163	-9	-9	219	137	194	169	88	161	119	231
L_24	-9	-9	78	110	116	172	150	378	182	97	88	94	83	68	151	124	99	172	182	96	99	88	138	124	105	84	156	88	85	91	153	163	-9	-9	219	137	194	163	86	159	119	215
L_24	-9	-9	80	110	116	172	160	408	184	109	88	94	83	68	155	126	99	172	186	96	101	90	140	124	105	84	176	90	87	91	153	163	-9	-9	223	137	194	163	86	161	119	231
L_25	-9	-9	82	110	116	172	150	392	182	89	88	96	83	68	151	120	101	172	182	96	99	86	138	124	105	84	146	84	87	91	153	163	-9	-9	219	137	194	163	88	161	119	185
L_25	-9	-9	82	110	124	172	158	404	182	91	88	96	83	68	153	124	107	172	184	98	99	90	140	124	107	98	158	98	87	91	153	163	-9	-9	219	137	194	163	88	161	119	203
L_26	-9	-9	78	110	122	172	152	378	178	95	88	94	83	68	153	126	99	172	176	96	97	88	136	124	105	84	156	84	87	91	153	163	-9	-9	219	137	194	165	86	159	119	207
L_26	-9	-9	82	110	124	172	160	406	182	97	88	94	83	68	157	130	101	172	180	96	97	92	138	124	105	98	162	88	93	91	153	163	-9	-9	219	137	194	165	86	161	119	207
L_27	-9	-9	82	110	124	172	150	328	182	89	88	96	83	64	149	120	99	172	180	96	95	88	152	124	105	84	154	84	87	91	153	163	-9	-9	219	137	194	163	88	159	119	205
L_27	-9	-9	82	112	124	172	162	328	182	93	88	96	83	68	155	128	105	172	182	98	95	94	152	124	105	100	172	92	91	91	153	163	-9	-9	219	137	194	167	90	161	119	213
L_28	-9	-9	-9	110	122	172	150	384	184	97	88	90	83	68	155	126	99	172	182	96	95	86	144	122	105	72	160	96	89	91	153	163	-9	-9	219	137	194	163	88	159	119	201
L_28	-9	-9	-9	110	124	172	162	404	184	109	88	94	83	68	157	126	99	172	182	98	95	90	144	122	105	84	164	96	93	91	153	163	-9	-9	219	137	194	165	88	161	121	245
L_29	-9	-9	82	110	124	172	150	392	182	89	88	96	83	64	-9	120	99	172	182	96	99	88	138	122	105	84	156	86	87	91	153	163	-9	-9	219	137	194	165	86	161	119	247
L_29	-9	-9	82	112	124	172	150	404	184	91	88	96	83	68	-9	132	101	172	182	98	103	92	140	122	105	84	176	96	93	91	153	163	-9	-9	219	137	194	165	88	161	119	247
L_30	-9	-9	82	110	124	172	150	392	182	93	88	96	83	68	153	124	99	172	180	96	99	88	138	122	105	84	158	88	87	91	153	163	-9	-9	219	137	194	165	88	157	119	199
L_30	-9	-9	86	110	124	172	162	416	184	97	88	96	83	68	157	124	101	172	186	98	103	94	138	122	105	84	158	88	91	91	153	163	-9	-9	223	137	194	169	88	163	119	215
L_31	-9	-9	82	110	122	172	152	452	182	93	88	96	83	68	151	124	101	172	176	96	93	86	138	124	105	84	156	88	85	89	153	163	-9	-9	219	137	194	165	86	157	119	215
L_31	-9	-9	82	110	124	172	164	452	186	93	88	96	83	68	155	124	103	172	182	98	93	94	138	124	105	100	164	94	91	91	153	163	-9	-9	219	137	194	167	88	163	119	247
L_32	-9	-9	82	110	124	172	152	388	180	93	88	90	83	64	151	-9	99	172	182	96	97	86	138	122	105	84	154	84	87	91	153	163	-9	-9	219	137	194	165	88	157	119	203
L_32	-9	-9	82	112	124	172	162	412	184	95	88	90	83	68	157	-9	107	172	182	98	97	92	140	122	105	100	156	94	87	91	153	163	-9	-9	219	137	194	167	88	163	119	217
L_33	-9	-9	84	108	124	172	150	418	182	91	88	96	83	64	151	128	99	172	182	96	95	88	138	120	105	84	148	84	91	91	153	163	-9	-9	219	137	194	163	86	157	119	193
L_33	-9	-9	84	110	124	172	164	418	182	119	88	96	83	64	155	128	105	172	182	100	95	90	138	124	105	84	154	98	91	91	153	163	-9	-9	219	137	194	169	90	163	119	217
L_34	-9	-9	84	110	116	172	150	414	182	95	88	96	83	64	151	126	97	172	182	96	101	86	138	124	105	84	152	86	85	89	153	163	-9	-9	219	137	194	163	86	163	121	221
L_34	-9	-9	84	110	124	172	164	426	184	119	88	96	83	68	155	132	99	172	184	98	101	108	146	124	105	98	156	94	87	89	153	163	-9	-9	219	137	194	167	88	163	121	261
L_35	-9	-9	80	110	116	172	150	374	184	97	88	94	83	92	-9	124	103	172	180	96	93	86	136	124	105	84	152	88	89	91	153	163	-9	-9	219	137	194	161	88	163	119	201
L_35	-9	-9	82	110	126	172	164	374	184	99	88	94	83	126	-9	124	107	172	184	98	93	94	144	124	105	100	156	90	93	91	153	163	-9	-9	223	137	194	165	88	163	119	205
L_36	-9	-9	84	110	124	172	150	376	182	93	88	96	83	58	153	124	99	172	180	96	97	88	138	124	105	84	156	84	87	89	153	163	-9	-9	219	137	194	161	88	157	119	215
L_36	-9	-9	86	110	124	172	164	452	184	97	88	96	83	64	157	126	101	172	186	98	97	92	138	124	105	84	158	96	91	91	153	163	-9	-9	223	137	194	165	88	163	119	243
L_37	-9	-9	82	110	124	172	150	406	182	85	88	96	83	64	153	126	93	172	176	98	99	88	142	124	105	84	156	88	85	91	153	163	-9	-9	219	137	194	163	86	157	119	191
L_37	-9	-9	82	110	124	172	164	472	184	97	88	96	83	68	155	126	101	172	182	100	99	96	142	124	105	100	166	94	91	91	153	163	-9	-9	219	137	194	165	86	163	119	225
